1 **Fortuitous events in the evolution of Light-dependent Protochlorophyllide**  
2 **Oxidoreductase**

3 Pratihtha Vedalankar<sup>1</sup> and Baishnab C Tripathy<sup>\*2</sup>

4 <sup>1</sup> School of Life Sciences, Jawaharlal Nehru University, New Delhi 110067, India

5 <sup>2</sup> Department of Biotechnology, Sharda University, Greater Noida 201310, Uttar Pradesh,  
6 India

7 **Running Title.** Evolution of Light-dependent Protochlorophyllide Oxidoreductase

8 \*Corresponding author

9 Correspondence should be addressed to

10 Professor Baishnab C Tripathy

11 Department of Biotechnology

12 Sharda University

13 Greater Noida

14 Uttar Pradesh 201310

15 India

16 Email. [baishnabtripathy@yahoo.com](mailto:baishnabtripathy@yahoo.com)

17

18 Pratihtha Vedalankar<sup>1</sup>

19 School of Life Sciences

20 Jawaharlal Nehru University

21 New Delhi 110067

22 India

23 Email. [pratihtha.verma@gmail.com](mailto:pratihtha.verma@gmail.com)

24 Number of Words – 10144

25 Number of Figures-4

26

27

28 **Highlights**

29

30 1. Protochlorophyllide oxidoreductase is an important photo-enzyme in angiosperms that  
31 needs light as a substrate for the synthesis of chlorophylls. Therefore, angiosperms cannot  
32 green in dark although several algae and lower green plants can synthesize chlorophyll in  
33 dark due to the presence of light-independent protochlorophyllide oxidoreductase (LIPOR).

34 2. In response to climate change, during the great oxygenation event light-dependent  
35 protochlorophyllide oxidoreductase (LPOR) evolved due to the O<sub>2</sub>-induced selection pressure  
36 that inactivated the oxygen-sensitive LIPOR.

37 3. Increased O<sub>2</sub> concentration, changing light quality and quantity at different depths of  
38 ocean, gene reorganization during several endosymbiotic events, selective LIPOR gene loss  
39 and multiple duplication events played a major role in the evolution and diversification of  
40 LPOR and its isoforms in phototrophs.

41 4. Phylogenetic studies indicate that LPOR genes have been overwhelmingly  
42 horizontally transferred between phototrophs and also non phototrophic organisms.

43 5. Presence of LPOR in non-photosynthetic organisms, Mycobacterium and certain  
44 fungi suggests that LPOR may have some other reductive functions in these organisms.

45

46

47

48

49

50

51

52

53

54 **Abstract**

55 Light-dependent protochlorophyllide oxidoreductase (LPOR) is a nuclear-encoded  
56 photoenzyme in many photosynthetic organisms. LPOR originated in primitive  
57 cyanobacterial ancestors during the great oxygenation event that was detrimental to the  
58 existence of the oxygen-sensitive LIPOR that prevailed in anoxygenic Earth. Both LIPOR  
59 and LPOR catalyse reduction of protochlorophyllide to chlorophyllide in the penultimate step  
60 of chlorophyll biosynthesis. Except for angiosperms and gnetophytes several oxygenic  
61 phototrophs harbour both LIPOR and LPOR. The coexistence of LIPOR and LPOR in  
62 certain phototrophs provides niche spaces for organisms in uncondusive environment. The  
63 selection pressure of increased O<sub>2</sub> concentration, changing light quality and quantity at  
64 different depths of the ocean, nutrient status of water, gene reorganization during several  
65 endosymbiotic events, horizontal gene transfer, LIPOR gene loss and multiple duplication  
66 events played a major role in the evolution and diversification of LPOR and its isoforms in  
67 photosynthetic and non-photosynthetic organisms. In the absence of LIPOR angiosperms  
68 become vulnerable to protochlorophyllide-sensitized and light-induced oxidative stress  
69 mediated by singlet oxygen. To overcome the photo-damage PORA was expressed  
70 abundantly in the plastids of etiolated plants. PORB evolved to take over the function of  
71 vanishing PORA isoform in light. Brassicales evolved PORC to protect plants from high light  
72 and other environmental stresses.

73

74 **Keywords:** chlorophyll biosynthesis, climate change, endosymbiosis, gene duplication,  
75 horizontal gene transfer, photosynthesis, protochlorophyllide oxidoreductase

76 **Abbreviations:** endosymbiotic gene transfer (EGT), horizontal gene transfer (HGT), light-  
77 dependent protochlorophyllide oxidoreductase (LPOR). light-independent  
78 protochlorophyllide reductase (LIPOR),

79

80

81

## 82 **1. Introduction**

83 Photosynthesis involves the conversion of the solar energy into chemical energy using readily  
84 available raw materials. What makes photosynthesis truly exceptional is that not only does it  
85 synthesize the building blocks of life, but it also provides the critically important oxygen for  
86 the much-needed survival of higher forms of living organisms (Björn, 2009; Blankenship,  
87 2010). The status quo of photosynthetic processes was not always as we see it now.  
88 Evolutionary processes have left an indelible imprint on the timeline of photosynthesis. When  
89 the first photosynthetic organisms originated around 3.4 billion years ago (bya), earth was  
90 dominated by anoxygenic phototrophs that used hydrogen sulphide or other substrates as  
91 electron donors without the evolution of oxygen. The prokaryotic oxygenic phototrophs that  
92 originated in anoxygenic earth created the great oxygenation event (GOE) approx. 2.2 to 2.7  
93 bya (Björn, 2009; Blankenship, 2010; Hohmann-Marriott and Blankenship, 2011; Buick,  
94 2008; Schirmer et al., 2013; Fujita and Uesaka, 2022). This established the oxygenic  
95 photosynthesis on earth. The primary endosymbiotic event that gave rise to the classical  
96 double membrane bound organelles chloroplast and mitochondria occurred around 1.5 bya.  
97 Endosymbiosis culminated into the evolution of present day eukaryotic oxygenic  
98 photosynthetic organisms that use light energy for the oxidation of water, thereby releasing  
99 oxygen (Blankenship and Hartman, 1998; Archibald 2009;2015; Blankenship, 2010; Rebeiz  
100 et al., 2010; Hohmann-Marriott and Blankenship, 2011; Cardona, 2019).

101 Photosynthesis takes place with the help of the tetrapyrrolic light absorbing pigment  
102 molecules bacteriochlorophylls (BChls) and chlorophylls (Chls) in anoxygenic and oxygenic  
103 phototrophs respectively (Chen et al. 2010; Nascimento et al. 2016). The light-dependent  
104 reaction takes place in photosynthetic membranes and begins with photon absorption by  
105 pigment molecules associated with antennae proteins, followed by excitation energy transfer  
106 to the reaction centres (RC). The absorbed solar energy is conserved in the form of high-  
107 energy bonds of adenosine triphosphate (ATP), and a strong reductant, the reduced  
108 nicotinamide adenine dinucleotide phosphate (NADPH) (Rabinowitch, 1965; Rabinowitch  
109 and Govindjee, 1969; Bryant et al., 2020). There are many different types of Chls (Chla,  
110 Chlb, Chlc, Chld, Chle, Chlf, Chlg) and Bchls (Bchl a, Bchl b, Bchl c, Bchl d, Bchl e, Bchl f,  
111 Bchl g) (Chen et al., 2010; Kobayashi et al., 1998; Fujita and Yamakawa, 2017; Bryant et al.,  
112 2020). In oxygenic phototrophs Chl a is the most abundant Chl species which is a product of  
113 several enzymatic steps (depicted in Fig 1.) some of which are common for the biosynthesis  
114 of Bchl and Chl molecules (Chen et al., 2010; Scheer, 2006, Tripathy and Pattanayak, 2012).

115

116 5-Aminolevulinic acid (ALA) is the first committed precursor for the synthesis of Mg-  
117 tetrapyrroles such as the Chls, Fe-tetrapyrroles, heme, cobalamin (vitamin B12), siroheme,  
118 and coenzyme F430 (Battersby, 2000; Hunter and Ferreira, 2009). In several bacteria and  
119 higher phototrophs ALA is synthesized from glutamyl-tRNA<sub>Glu</sub> by the activities of two  
120 distinct enzymes glutamyl-tRNA reductase (GluTR) and glutamate 1-semialdehyde  
121 aminotransferase (GSA-AT). However, ALA is synthesised from succinyl CoA and glycine  
122 in  $\beta$  proteobacteria, fungi and animals catalysed by ALA synthase. The biosynthesis of Chls,  
123 Heme or Bilin is similar till the formation of non-conjugated macrocyclic tetrapyrrole  
124 protoporphyrin IX from ALA (Beale, 1999; Tripathy and Dalal, 2013). At the onset  
125 condensation of two ALA molecules results in the synthesis of a 5-membered heterocyclic  
126 ring of porphobilinogen. Thereafter four molecules of porphobilinogen assemble to form the  
127 linear tetrapyrrole hydroxymethylbilane (Tanaka and Tanaka, 2007; Tripathy and Pattanayak,  
128 2012; Bryant et al., 2020). Cyclization of hydroxymethylbilane forms uroporphyrinogen III  
129 with the inversion of the pyrrole D ring (Tanaka and Tanaka, 2007; Tripathy and Pattanayak,  
130 2012; Brzezowski et al., 2015). Uroporphyrinogen-III is decarboxylated to produce  
131 coproporphyrinogen III. In addition to the synthesis of Chl, uroporphyrinogen-III serves as  
132 the substrate for siroheme biosynthesis. The two propionate side chains on the rings A and B  
133 of coproporphyrinogen III are oxidatively decarboxylated to produce protoporphyrin IX  
134 (Bollivar, 2006; Rebeiz et al., 2010). With the removal of 6 electrons from the macrocycle of  
135 protoporphyrinogen IX, aromaticity is conferred to the macrocycle to generate  
136 protoporphyrin IX. Protoporphyrin IX is the branch point for heme and Chl biosynthesis. The  
137 iron branch begins with the insertion of  $\text{Fe}^{2+}$  to protoporphyrin IX for heme biosynthesis  
138 (Tanaka and Tanaka, 2006; Scheer, 2006; Granick and Beale, 1978; Castelfranco and Beale,  
139 1983; Carey et al., 1985). The insertion of  $\text{Mg}^{2+}$  ion into protoporphyrin IX converts it into  
140 Mg-protoporphyrin IX. Mg-protoporphyrin IX is esterified to form Mg protoporphyrin IX  
141 monomethyl ester that is subsequently metabolised by addition of a fifth isocyclic ring to  
142 synthesise Divinyl Protochlorophyllide (DV Pchlde). Protochlorophyllide (Pchlde) is the  
143 last common intermediate to a vast array of Chls (including Chl a, Chl b and BChls). It is also  
144 the bifurcation point for the formation of the Chl c family. In many phototrophs DV Pchlde  
145 is often acted upon by vinyl reductase to form Monovinyl protochlorophyllide (MV Pchlde)  
146 (Monovinyl plants) mostly during night time. MV Pchlde and DV Pchlde are acted upon by  
147 one of the key enzymes of Chl biosynthesis pathway, protochlorophyllide oxidoreductase

148 (POR) that catalyses the reduction of C17 – C18 double bond of D ring of Pchlide to  
149 synthesise Divinyl Chlorophyllide *a* (DV Chlide *a*) and Monovinyl chlorophyllide *a* (MV  
150 Chlide *a*) respectively. DV Chlide *a* so formed is swiftly converted to MV Chlide *a* by vinyl  
151 reductase (Duggan and Rebeiz, 1982; Tripathy and Rebeiz, 1986; 1988; Tripathy and  
152 Pattanayak, 2012). Chlorophyllide *a* (Chlide *a*) is metabolised to chlorophyllide *b* (Chlide *b*)  
153 by chlorophyllide *a* oxygenase (CAO) and both Chlide *a* and Chlide *b* are esterified with  
154 phytol to form Chl *a* or Chl *b* (Duggan and Rebeiz, 1982; Tripathy and Rebeiz, 1986; 1988).

155

## 156 **2. Protochlorophyllide oxidoreductase**

157 POR exists in two different non-homologous enzymatic forms in phototrophs- (1) NADPH  
158 Light dependent Protochlorophyllide Oxidoreductase (LPOR) and (2) Light Independent or  
159 Dark Operative Protochlorophyllide Oxidoreductase (DPOR/LIPOR) (Griffiths, 1978; Fujita,  
160 1996; Adamson et al., 1997; Brzezowski et al., 2015; Vedalankar and Tripathy, 2019). Even  
161 though both the POR enzymes catalyse the same reaction they differ from each other right  
162 from their origin, subunit composition, structure, catalytic mechanism, and their spread and  
163 diversity across the photosynthetic organisms (Hunsperger et al., 2015).

164 LIPOR originated under anoxygenic conditions in the reducing atmosphere of primitive earth.  
165 It is widely distributed among photosynthetic organisms ancient anoxygenic to oxygenic  
166 phototrophs including cyanobacteria, algae, bryophytes, pteridophytes and gymnosperms  
167 except gnetophytes and angiosperms (Bauer et al., 1993; Suzuki and Bauer, 1995; Fujita,  
168 1996; Boivin et al., 1996; Armstrong, 1998; Walmsley et al., 1999; Breznenová et al., 2010;  
169 Reinbothe et al., 2010). The reduction of Pchlide by LIPOR takes place in the absence of  
170 light in an ATP dependent reaction using ferredoxin as reductant (Bröcker et al., 2008;  
171 Nomata et al., 2016). LIPOR is encoded by three genes (BchL, BchN, BchB/ChlL, ChlN,  
172 ChlB) (Burke et al., 1993a ;1993b, Suzuki and Bauer, 1992; Bröcker et al., 2008; Fujita,  
173 1996). Structurally LIPOR is homologous to the ancient Nitrogenase enzyme and consists of  
174 two separable protein components: the L protein and the NB protein that are analogous to the  
175 Fe- protein and MoFe protein complex of the nitrogenase (Armstrong, 1998; Fujita and  
176 Bauer, 2000). The reductive L protein complex is a homodimer of bchLbchL/chlLchlL  
177 subunits, and the catalytic NB protein complex is composed of a heterotetramer of  
178 2bchNbchB/2chlNchlB subunits (Fujita and Bauer, 2000; Bröcker et al., 2010).

179 In contrast to LIPOR that is coded by the chloroplast genome, LPOR is a nuclear encoded,  
180 single polypeptide of approx. 36kda and has an absolute requirement of light for catalysing  
181 the reduction of Pchl<sub>id</sub> to Chl<sub>id</sub> (Mullet, 1988; Hunsperger et al., 2015). It requires  
182 NADPH as a cofactor and having evolved in the oxygenic environment it is prevalent in all  
183 oxygenic phototrophs; unlike LIPOR, the LPOR is insensitive to oxygen (Armstrong, 1998;  
184 Bollivar, 2006; Yamamoto et al., 2009). LIPOR is believed to have originated prior to GOE  
185 and hence it is considered to be the ancient Pchl<sub>id</sub> reducing enzyme (Yang and Cheng, 2004;  
186 Björn, 2009; Schirmermeister et al., 2013). It is widely believed that the GOE triggered the  
187 evolution of LPOR during earth's transition from reducing to oxidising atmosphere created  
188 by O<sub>2</sub> evolving cyanobacteria that converted oceanic water to oxygen (Buick, 2008).  
189 Evolutionarily both the Pchl<sub>id</sub> reducing enzymes, LIPOR and LPOR coexist in many  
190 photosynthetic organisms (Yang and Cheng, 2004; Yamazaki et al., 2006; Vedalankar and  
191 Tripathy, 2019). This review discusses the conundrum of origin and evolution of LPOR, a  
192 key light-driven enzyme that plays a crucial role in the Chl biosynthesis and plant  
193 development. A better understanding of the LPOR would allow us to understand the need for  
194 the existence of entirely two different enzymatic processes for Pchl<sub>id</sub> reduction i.e., the  
195 selection pressure that upended the light-independent reduction to a completely different  
196 light-dependent process (Suzuki and Bauer, 1995).

197 It has been well established that light is an indispensable component for the activity of LPOR  
198 enzyme much like the DNA repair enzyme DNA photolyase (Begley, 1994; Björn, 2018),  
199 bacterial chlorophyllide a reductase (COR) (Saphier et al., 2005), cyanobacterial  
200 chlorophyllide f synthase (Chen et al., 2010; Galperin et al., 1998; Ho et al., 2016) and fatty  
201 acid photodecarboxylase (FAP) (Sorigué et al., 2017). In addition to light, LPOR requires  
202 NADPH as a reductant and Pchl<sub>id</sub> as a target substrate to catalyse the stereospecific  
203 reduction of the C17- C18 double bond in the porphyrin D ring of (Pchl<sub>id</sub> a) - to (Chl<sub>id</sub>-a)  
204 (Yang and Cheng, 2004; Gabruk and Mysliwa-Kurdziel, 2015). Photoreduction of Pchl<sub>id</sub> to  
205 Chl<sub>id</sub> is an ultrafast event that involves transient charge separation across the C17-C18  
206 double bond of the pigment leading to the formation of charge transfer intermediates which  
207 facilitate the step wise hydride and proton transfer. These intermediates have been analysed  
208 on an ultra-fast time scale by time resolved fluorescent measurements. The proton transfer to  
209 C18 of Pchl<sub>id</sub> by charge transfer intermediates occurs at approx. 3 picoseconds during the  
210 first dark reaction while the rate limiting hydride transfer step from pro-S face of NADPH to  
211 C17 of Pchl<sub>id</sub> occurs at 400 ps. The rate of hydride transfer in Pchl<sub>id</sub> photoreduction is

212 faster in eukaryotes as compared to prokaryotes suggesting that efficient LPOR evolved  
213 during the endosymbiotic era (Heyes and Hunter, 2005; Heyes et al., 2006;2021).

### 214 **3. Epochal events leading to the origin of LPOR**

215 The redox state of the earth's atmosphere changed dramatically around 2.45 Ga years making  
216 free O<sub>2</sub> a permanent constituent of the earth's atmosphere mostly due to the recruitment of  
217 Mn-containing oxygen-evolving complex proteins and the evolution of chlorophyll by  
218 cyanobacteria that utilized the absorbed solar energy for photolysis of water (Van  
219 Kranendonk et al., 2012). This oxygenic photosynthesis allowed the evolutionary emergence  
220 of eukaryotes, multicellular organisms, and complex life forms as we know them. The  
221 cyanobacterial diversity indicates the origin of cyanobacterial ancestors sometime in the  
222 Archean era. The rise of oxygen during the GOE exerted evolutionary pressure on the 4Fe-4S  
223 center containing the oxygen-sensitive L subunit of LIPOR and triggered the origin of the  
224 oxygen-insensitive Pchlide-reducing enzyme LPOR (Olson, 2001; Schoefs and Franck, 2003;  
225 Yamazaki et al., 2006; Nomata et al., 2006; Yamamoto et al., 2009; Reinbothe et al., 2010;  
226 Hunsperger et al., 2015). It is noteworthy that the oxygen level present during the late  
227 Proterozoic era just after GOE was adequate for the evolution of LPOR (Olson, 2001; Björn,  
228 2009; Blankenship, 2010; Schirrmeister et al., 2013; Shih et al., 2013). Similarly,  
229 cyanobacteria having another O<sub>2</sub>-sensitive enzyme nitrogenase, like LIPOR, having a  
230 monopolistic dominance in the anoxygenic environment (Fujita and Bauer, 2000) acquired  
231 temporal differentiation by carrying out nitrogen fixation in the dark and spatial  
232 differentiation by confining nitrogen fixation to specialized cells called heterocysts. These  
233 heterocystous cyanobacteria evolved late in the O<sub>2</sub> event to protect themselves from the  
234 oxygenic threat (Fujita and Bauer, 2000; Yamazaki et al., 2006; Fujita and Uesaka, 2022).  
235 However, a similar mechanism was not observed in LIPOR, and it is speculated that LIPOR  
236 acquired some other protective mechanisms such as the water-water cycle to remove oxygen  
237 to combat the oxygen sensitivity (Durnford and Falkowski, 1997). The evolution of LPOR  
238 did not lead to the extinction of LIPOR. Both the nonhomologous Pchlide-reducing enzymes  
239 coexist among the oxygenic phototrophs, the only exceptions being gnetophytes and  
240 angiosperms where LIPOR is non-existent (Walmsley et al., 1999; Schoefs and Franck, 2003;  
241 Yamazaki et al., 2006; Hunsperger et al., 2015). Why the two enzymes still coexist today  
242 even in advanced archegoniate like gymnosperms does not have a precise answer.



243 Evolution and spread of LPOR took a magnificent jump to higher eukaryotes that acquired  
244 photosynthesis via endosymbiosis. The primitive cyanobacterium was established as a  
245 photosynthetic organelle called plastid inside the eukaryotic phototrophs about 1.5 bya  
246 (Archibald, 2009; Chan and Bhattacharya, 2010; Keeling, 2010).The photosynthetic  
247 eukaryotic ancestor gave rise to the complex supergroup Archiplastida that branched out into  
248 three separate photosynthetic lineages – the Glaucophyta, Viridiplantae (comprising green  
249 algae and land plants), and Rhodophyta –the red algae. Subsequently, the secondary, tertiary,  
250 and higher-order endosymbiosis transmitted the plastids amongst eukaryotes to give rise to  
251 the present-day diversity of eukaryotic photosynthetic lineages (Tomitani et al., 1999; Chan  
252 et al., 2010; Keeling, 2010; Archibald and Keeling, 2002; Archibald 2015). The  
253 endosymbiotic process has played a crucial role in the evolution of photosynthetic genes in  
254 eukaryotes. A major aftermath of endosymbiosis was a massive transfer of genes from the  
255 endosymbiont to the host nucleus (Keeling, 2010). The endosymbiotic genes underwent  
256 several recombination events and became integrated into the host nuclear genome. As a  
257 result, the size of the plastid genome was significantly reduced compared with the original  
258 cyanobacterial endosymbiont. After primary endosymbiosis, the LPOR genes were  
259 transferred to the nucleus, while the LIPOR genes remained in the chloroplast genome or  
260 were lost in several algal lineages and higher plants in the oxygenic environment (Hunsperger  
261 et al., 2015). Until recently only a single endosymbiotic gene transfer event was thought to  
262 have occurred that led to the origin of plastids by engulfment of the  $\beta$ -Cyanobacteria  
263 possessing  $\beta$ -carboxysomes with Form-IB Rubisco (Kerfeld and Melnicki, 2016). About 60  
264 million years ago another independent endosymbiotic event took place in freshwater rhizarian  
265 amoeba *Paulinella chromatophora* (Nowack, 2014; Kim and Park, 2016). These organisms  
266 retain cyanobacterial prey of the Prochlorococcus and Synechococcus sp PCC 7002 of  $\alpha$   
267 Cyanobacteria type which has  $\alpha$ -carboxysomes with Form-IA Rubisco (Kerfeld and  
268 Melnicki, 2016; Gabr et al., 2020). The endosymbiotic photosynthetic entities in *P.*  
269 *chromatophora* are called as chromatophores that absorb solar energy and they retain  
270 cyanobacterial features such as carboxysomes, phycobilisomes, peptidoglycan cell wall  
271 (Nowack and Grossman, 2012; Kerfeld and Melnicki, 2016; Kim and Park, 2016). This is a  
272 chloroplast in making.

273 In prokaryotes, horizontal gene transfer (HGT) is ingrained within the genealogical fabric of  
274 the organisms (Treangen and Rocha, 2011; Bock, 2010; Koonin, 2016). The numerous  
275 instances of HGT in organisms although sporadic give ample evidence of the important and

276 pervasive role of lateral gene transfer (Bock, 2010; Brinkmann et al., 2018). The temporal  
277 intrusions in HGT are a result of a unique combination of begging or borrowing or stealing  
278 genetic information across the natural mating barriers (Ku and Martin, 2016; Bock, 2010).  
279 The presence of ancestral, novel genes or paralogs of existing genes or xenologous sequences  
280 can be estimated from the phylogenetic analysis depicting the divergence of the recipient  
281 from the direct ancestor (Ku and Martin, 2016; Cohen et al., 2011; Hunsperger et al., 2015).  
282 The HGT has contributed immensely towards the evolutionary process of LPOR in  
283 photosynthetic organisms. LPOR phylogeny follows the identical pattern to the plastid  
284 transfer among algae originating from primary endosymbiosis (Hunsperger et al., 2015).  
285 Typically, plastids derived from green algae fall into three separate lineages streptophytes,  
286 chlorophytes, and primitive prasinophytes (Archibald and Keeling, 2002). The phylogenetic  
287 studies reveal that the marine phototrophic amoeboid flagellates chlorarachniophytes evolved  
288 from the chlorophyte clade (Chlorophyceae– Trebouxiophyceae– Ulvophyceae–  
289 Pedinophyceae) of green algae (Cavalier-Smith, 1998). The chlorarachniophyte plastids  
290 typically contain green algal footprints but some members of chlorarachniophyte including  
291 *Bigeloviella natans* contain plastid proteomes and nuclear genes heavily infected with LPOR  
292 genes originating from phylogenetically divergent red algae or from xenologous sources  
293 (Curtis et al., 2012; Hunsperger et al., 2015). The abundance of ‘foreign’ genes in  
294 *Bigeloviella natans* as a result of HGT compensates for the mixotrophic lifestyle (Rogers et  
295 al., 2007; Curtis et al., 2012; Burki, 2017). LPOR proteins originating from the green algae  
296 lineage due to the secondary endosymbiotic event are found to be sister branches to one  
297 another and nested within the prasinophyte algae indicating a possibility of HGT from  
298 prasinophyte to the chlorarachniophyte (Hunsperger et al., 2015). The LPOR proteins  
299 funneled from the Rhodophyta branch of plastids should belong within the rhodophytic clade  
300 but there are numerous instances with most members following a rather reticulate path  
301 similar to that observed due to secondary and higher-order symbiosis. The exact origins of  
302 the LPOR genes transferred via red algal lineage are complex (Hunsperger et al., 2015).  
303 Phylogenetic studies demonstrate that maximum members of stramenopiles demonstrate an  
304 affinity to the prasinophytes branch. All sequenced haptophytes and quite a few peridinin-  
305 containing dinoflagellates show their origin within the prasinophytic branch of LPOR  
306 proteins (Hackett et al., 2004; Minge et al., 2010). Either the primary Rhodophyta LPOR  
307 genes have been completely replaced by HGT to the chlorophyte genes. Within the  
308 Cryptophytes and Heterokonts bearing rhodophytic LPORs several phylogenetic  
309 reconstructions are observed originating from EGT and several independent HGTs (Keeling,

2010; Hunsperger et al., 2015). Diatoms acquired plastids via secondary endosymbiosis from the red algal lineage (Armbrust et al., 2004; Janouškovec et al., 2010). The diatom *Alexandrium tamarensense* shows presence of prasinophytic LPOR genes acquired from green alga *Micromonas* sp as a result of HGT (Wisecaver et al., 2013; Hunsperger et al., 2015). The recently sequenced genome of a number of diatoms reveals a chimeric or transgenic genome that shows several traces of green algae footprints and xenologues acquired from a variety of other sources by EGT and HGT (Petersen et al., 2014). This feature enables diatoms to survive in difficult habitats and varying environmental conditions.

#### 4. Migration of LPOR to anoxygenic photosynthetic organisms.

Like millions of oxygenic photosynthetic species possess LPOR, several aerobic anoxygenic phototrophic bacteria (AAPB) have functional LPOR sequences. AAPBs are a ubiquitous group of marine microbes that possess light harvesting reaction centers supplemented with heterotrophic metabolism. a globally conserved structure similar to the well-characterized cyanobacterial LPOR (Biebl et al., 2005; Chernomor et al., 2021). In contrast to anoxygenic photosynthetic bacteria (APB) like *Rhodobacter capsulatus* AAPBs can perform anoxygenic photosynthesis in the presence of atmospheric oxygen (Yurkov and Hughes, 2017). Possession of LPOR by AAPBs is an adaptation to increase Bchl synthesis under aerobic conditions. Members of  $\alpha$  proteobacteria - *Dinoroseobacter shibae*, *Erythrobacter litoralis*, *Yoonia vestfoldensis*, *Sulfitobacter guttiformis*, *Porphyrobacter dokdonensis* and  $\beta$  proteobacteria – *Limnohabitans* sp. and *Burkholderia* sp acquired LPOR probably due to HGT from cyanobacteria like organisms involving multiple gene transfer events that might have taken place at different time points (Biebl et al., 2005; Brinkhoff et al., 2010; Wagner-Döbler et al., 2010; Kaschner et al., 2014; Wang et al., 2014; Chernomor et al., 2021; Bryant and Frigaard, 2006; Yurkov and Hughes, 2017; Kasalický et al., 2018). Anoxygenic phototroph *Gemmatimonas phototrophica* member of phylum Gemmatimonadetes also acquired LPOR as an inter-phylum HGT from proteobacteria (Zeng et al., 2015; Chernomor et al., 2021). Phylogenetic studies by Chernomor et al. 2021 expand the database of LPOR sequences in AAPBs. The refuge of LPOR in AAPBs is part of a design rather than a chance event or an accidental event which turns favourable and this is not restricted to a few proteobacterial species thus firmly establishing the presence of LPOR in AAPBs (Chernomor et al., 2021).

#### 5. Gene duplication

342 Gene duplication is another major mechanism that introduces genomic novelty among  
343 organisms (del Pozo and Ramirez-Parra, 2015). The duplication event not only increases the  
344 copy number of the duplicated gene but with time a copy of the duplicated gene might  
345 accumulate mutation and acquire a novel function in the genome (Birchler and Yang, 2022;  
346 Savino et al., 2022). In many cases, the duplicated gene ends up as a non-functional  
347 counterpart which does not make a functional product due to modifications in the DNA  
348 sequence by nucleotide insertions, deletions, frameshifts, or substitutions that disrupt the  
349 reading frame or lead to the insertion of a premature stop codon (Hunsperger et al., 2015;  
350 Savino et al., 2022). Three algae lineages underwent genome duplications resulting in LPOR  
351 duplication: dinoflagellates, chlorarachniophytes, haptophytes, and stramenopiles  
352 (Janouškovec et al., 2017).

353 The Brassicales underwent three whole genome duplications and the three isoforms of LPOR  
354 in *Arabidopsis* may be the outcome of these events (Oosawa et al., 2000; Pattanayak and  
355 Tripathy, 2002). LPOR expansion in different photosynthetic organisms shows that it exists  
356 in three different isoforms within the genome of photosynthetic organisms (Yang and Cheng,  
357 2004). The LPOR genes in Brassicales are very similar at the nucleotide level which probably  
358 reflects recent gene duplication (Oosawa et al., 2000). LPOR gene duplication occurred after  
359 the primary endosymbiotic event in eukaryotic plant cells (Archibald, 2015). The LPOR  
360 isoforms in some photosynthetic eukaryotes share similar functions and regulations even  
361 though they have been shown to arise from unique duplication events during evolution  
362 (Hunsperger et al., 2015). The evidence for the gene duplication event comes from  
363 phylogenetic trees which show the distribution of each of the two gene copies between two  
364 principal branches of the tree (Hunsperger et al., 2015). Studies show that euglenids and  
365 chlorarachniophytes arose from two unique duplication events. *Hordeum vulgare* and *A.*  
366 *thaliana* LPOR sequences arose independently but they have similar functions in seedling  
367 greening and Chl synthesis.

368 Recent studies have identified multiple LPOR genes arising as a result of duplication in  
369 several diatom genomes including *Phaeodactylum tricornutum*, *Thalassiosira pseudonana*  
370 (Armbrust et al., 2004) *Fragilariopsis cylindrus*, and *Pseudo-nitzschia multiseriis*. Two  
371 LPOR isoforms (POR1 and POR2) present in *Phaeodactylum tricornutum* genome are the  
372 result of gene duplication to enable it to adapt under varying light conditions (Armbrust et al.,  
373 2004; Hunsperger et al., 2015). Certain members of cryptophytes show LIPOR gene loss but  
374 other members retain functional LIPOR genes. In cryptophyte, *Chroomonas mesostigmatica*

375 CCMP1168 some of the sequences of chlN occur as a pseudogene, stop codons, and  
376 frameshifts in the nuclear genome. The chlL is absent from *Rhodomonas salina*, *G. theta*, and  
377 *H. andersenii* plastid or nuclear genome (Fong and Archibald, 2008; Hunsperger et al., 2015;  
378 Kim et al., 2017). Dinoflagellates *Heterocapsa triquetra* (Fong and Archibald, 2008) and  
379 *Amphidinium* (Lauritano et al., 2017) show the presence of only one subunit of chlL which  
380 has shown to be a functional copy by expressed sequence tag surveys. LIPOR subunit in *H.*  
381 *andersenii* and *Chroomonas pauciplastida* possess group II introns in different locations  
382 making the gene non-functional (Khan and Archibald, 2008). *Arabidopsis thaliana* and *Oryza*  
383 *sativa* contain approx 2700 and 5600 well-defined pseudogenes, respectively (del Pozo and  
384 Ramirez-Parra, 2015). Pseudogenes are non-functional but still beneficial in evolution as it  
385 helps the organism to counter or survive the changed environmental conditions (Treangen  
386 and Rocha, 2011). Plant genomes are replete with instances of the presence of pseudogenes  
387 that are non-functional but still beneficial in evolution as it helps the organism to counter or  
388 survive the changed environmental conditions. Several algae that lack LIPOR, including  
389 certain haptophytes and stramenopiles, the LPOR gene is duplicated, and it is hypothesized  
390 that this duplication might compensate for the loss of the dark enzyme, potentially by  
391 allowing for the differential regulation of the genes of the photoenzyme (Hunsperger et al.,  
392 2015).

## 393 **6. Impact of other Environmental factors on LPOR origin and evolution**

394 Environmental factors often determine the distribution and diversification of genes for  
395 appropriate adaptation. Genes are rendered inactive by a mutation or gene loss and become  
396 dispensable during evolutionary pressure. Although this might not be a universally adaptive  
397 process, it is helpful under certain situations to combat the evolutionary pressure (Helsen et  
398 al., 2020). Pchl<sub>ide</sub> reduction has endured various selective pressures across a range of  
399 environmental parameters after the transition of photosynthesis from an initial anoxygenic to  
400 an oxygenic environment. Some of the environmental factors include a) High altitude, b) Fe  
401 deficiency and c) high temperature, d) light intensity, e) light quality (Li and Bridwell-Rabb,  
402 2018; Przybyla-Toscano et al., 2021; Abbas et al., 2022; Kees et al., 2022).

403 In the oxygenic environment, O<sub>2</sub>-dependent MPE (oxidative) cyclase is responsible for  
404 Pchl<sub>ide</sub> synthesis (Figure 1). A decrease in the partial pressure of O<sub>2</sub> reduces the Pchl<sub>ide</sub>  
405 concentration in plants (Li and Bridwell-Rabb, 2018). Therefore, the POR activity is  
406 downregulated and it influences the distribution and accumulation of the Pchl<sub>ide</sub> and its

407 reducing enzyme POR at different altitudinal clines (Abbas et al., 2022). In the early  
408 oxygenic world, the lower partial pressure of oxygen was sufficient to generate stratospheric  
409 O<sub>3</sub> in the presence of UV light that prevented the UVB penetration and DNA damage of  
410 haploid life forms and produce ROS including singlet oxygen (<sup>1</sup>O<sub>2</sub>). ROS was not only  
411 responsible for the destruction of Fe-S centers of LIPOR in several species it also promoted  
412 the evolution of different isoforms of LPOR. However, this O<sub>2</sub> concentration was limiting for  
413 MPE (oxidative) cyclase, and therefore, it impacted Pchlide synthesis, LPOR evolution and  
414 Chl synthesis in early oxygenic haploid photoautotrophs.

415 Similarly, nutrient deficiency especially Fe impacted LPOR evolution with concomitant loss  
416 of LIPOR. The 4Fe-4S centers of L subunit of LIPOR needs Fe, for its synthesis and  
417 assembly. Oceanic diatoms *Phaeodactylum tricornutum*, *Thalassiosira pseudonana* and  
418 *Nannochloropsis oceanica* lost LIPOR because they are majorly present in Fe-sufficient  
419 oceanic water (Przybyla-Toscano et al., 2021). The low availability of micronutrient Fe  
420 encouraged the dispensability of LIPOR and the establishment of LPOR for better  
421 adaptability of other oceanic phototrophs that acquired LPOR by horizontal gene transfer  
422 (Behrenfeld et al., 2006; Bowler et al., 2010; Cvetkovska et al., 2019)

423 The LPOR activity in different species is also temperature dependent. In *Synechocystis* the  
424 optimum LPOR activity is at 30<sup>0</sup>C. However, in thermophilic cyanobacterium  
425 *Thermosynechococcus* elongates the optimum temperature for LPOR activity is between  
426 50<sup>0</sup>C- 55<sup>0</sup>C and it is less active at room temperature (McFarlane et al., 2005). Although  
427 cyanobacteria mostly possess both the Pchlide reducing enzymes i.e., LIPOR and LPOR;  
428 thermophilic cyanobacteria lack both LIPOR genes and nitrogenase genes. This loss of  
429 LIPOR genes is attributed to high temperature-induced genome reduction in thermophilic  
430 cyanobacteria (Kees et al., 2022).

431 Light intensity is a factor influencing the light-driven reaction rates. The LPOR disrupted  
432 YFP12 mutant of cyanobacteria and wild-type cyanobacteria grow normally under low light  
433 conditions (10-25  $\mu\text{E m}^{-2} \text{s}^{-1}$ ), but at high light intensity (85-170  $\mu\text{E m}^{-2} \text{s}^{-1}$ ), the mutants  
434 stop growing and are photo-bleached (Fujita et al., 1998). In contrast YFC2 mutant with  
435 disrupted ChlL (LIPOR less) grew rapidly at higher light intensities, suggesting that the  
436 contribution of LPOR in chlorophyll biosynthesis increases with increase in light intensity  
437 (Fujita et al., 1998). Under medium-light intensities (25–130  $\mu\text{E m}^{-2} \text{s}^{-1}$ ) as well as high-  
438 light intensities (above 130  $\mu\text{E m}^{-2} \text{s}^{-1}$ ) LPOR is majorly and exclusively functional for Chl

439 biosynthesis (Fujita et al., 1998). LIPOR is more energy-demanding than LPOR and thus has  
440 been replaced during the evolutionary process to allow photosynthetic organisms to follow a  
441 more conservative lifestyle (Masuda and Takamiya, 2004). The contribution of LPOR  
442 towards the Chl biosynthesis increases with increasing light intensity. LPOR acts as a trigger  
443 for the germination of seedlings in plants and provokes a marked change in the  
444 morphological development of the plant (Ha et al., 2017). At low light intensities, Chl content  
445 in cyanobacterium *Plectonema boryanum* lacking LIPOR was lower, and its growth rate is  
446 retarded (Huang et al., 2004). The early cyanobacteria that had only LIPOR most likely  
447 adapted to low light intensity for efficient Chl biosynthesis and photosynthesis for survival.  
448 In this context, *Chlamydomonas* sp. UWO241 is an intriguing chlorophyceae member as  
449 despite inhabiting low light conditions for extended periods it shows loss of LIPOR, as a  
450 result, Pchlide reduction is entirely carried out by LPOR (Bowler et al., 2010; Smith et al.,  
451 2019). *Chlamydomonas* sp. UWO241 with its reduced chloroplastic genome inhabits  
452 perennially ice-covered lakes of Antarctica with high dissolved oxygen content, iron limiting,  
453 and hypersaline conditions. The above conditions seem to support the loss of LIPOR  
454 (Behrenfeld et al., 2006; Bowler et al., 2010; Cvetkovska et al., 2019; Smith et al., 2019). It  
455 seems that the ancestral chlamydomonadalean clade that gave rise to UWO241 seems to have  
456 lost the LIPOR genes (Cvetkovska et al., 2019; Smith et al., 2019).

457 The spectral composition of the light changes with topographic factors. Red light which is of  
458 longer wavelength is mostly absorbed by the water at the surface. Blue light penetrates deep  
459 and turbid water. The red light is highly efficient for the LPOR-mediated photoconversion of  
460 Pchlide to Chlide (Dalal and Tripathy, 2012). Nevertheless, the supposed inefficiency of  
461 LPOR in deep or turbid water is not surprising as in these conditions only blue light is  
462 available due to the scattering. Greenlight that is available deep in the ocean is not efficiently  
463 absorbed by many phototrophs (Kehoe and Gutu, 2006). The action spectra of LPOR reveals  
464 that it is ineffective in green light, in such cases LIPOR compensates for the low LPOR  
465 activity. The members of the (Microchaetaceae) *Fremyella diplosiphon* (Shui et al., 2009;  
466 Pattanaik et al., 2011), (Nostocaceae) *N. punctiforme* (Hirose et al., 2013), (Rivulariaceae)  
467 *Gloeoetrichia 583* (Stowe et al., 2011) depict an interesting phenotype as an example of the  
468 complementary chromatic adaptation by alternating their photosynthetic pigments and  
469 enzymes under fluctuating light conditions (Hirose et al., 2013). It would not be hyperbolic to  
470 say that they can sense a rainbow of colors ranging from red, blue, green and violet  
471 (Grossman, 2003; Bordowitz and Montgomery, 2008; Kehoe, 2010). All these explain the

472 simultaneous existence of LPOR and LIPOR for sustenance and adaptation to environmental  
473 factors.

474 **6.1. Photoprotective role:** The catalytic rate of LIPOR for the dark conversion of Pchl<sub>id</sub> to  
475 Chl<sub>id</sub> is quite slow. Therefore, under the steady-state conditions of Chl biosynthesis the  
476 Pchl<sub>id</sub> accumulation in the cells of LIPOR-containing organisms is high (Soffe, 2016).  
477 Under high light that prevails on the ocean surface, the accumulated Pchl<sub>id</sub> in LIPOR-  
478 containing organisms absorb light and transfer their energy to oxygen to produce highly  
479 reactive singlet oxygen (<sup>1</sup>O<sub>2</sub>) (Chakraborty and Tripathy, 1992; Tripathy and Pattanayak  
480 2010; Pattanayak and Tripathy, 2011) that causes photooxidative damage to cells. The LPOR  
481 bestows photo-protection on the plants by limiting the Pchl<sub>id</sub>-mediated photo-oxidative  
482 damage (Buhr et al., 2008; Tripathy and Pattanayak, 2010, Pattanayak and Tripathy, 2011).  
483 Whereas the high light intensity on the surface of the ocean could photodamage the slow  
484 LIPOR-containing photoautotrophs, it can cause minimal damage to organisms possessing  
485 LPOR that converts Pchl<sub>id</sub> to Chl<sub>id</sub> rapidly within 1 millisecond (Sytina et al., 2008; Soffe,  
486 2016; Heyes et al., 2021). Thus, LPOR protects the etiolated and green phototrophs by  
487 binding to the photosensitive Pchl<sub>id</sub> pool to keep it in photo-transformable form for very fast  
488 photo-conversion of Pchl<sub>id</sub> to Chl<sub>id</sub> to minimize generation of singlet oxygen that causes  
489 destruction of photosynthetic organisms in high light (Tripathy and Chakraborty, 1991,  
490 Chakraborty and Tripathy, 1992, Tripathy and Pattanayak, 2011). In angiosperms during  
491 senescence the chlorophyll content rapidly declines, however, POR activity persists to photo-  
492 transform protochlorophyll<sub>id</sub> to minimize singlet oxygen production to ensure leaf survival  
493 and the translocation of photosynthates from the source to sink (Hukmani and Tripathy,  
494 1994).

495 The free Chls do not accumulate rather they bind to photosynthetic pigment-protein complex  
496 to efficiently transfer all of its absorbed energy to the reaction center for utilization. The  
497 antenna Chl molecules usually do not generate singlet oxygen (<sup>1</sup>O<sub>2</sub>) unless they are under  
498 high excitation pressure (Tripathy and Pattanayak, 2010; Pattanayak and Tripathy, 2011;  
499 Buhr et al., 2008). Therefore, high light acted as a selection pressure for the evolution of  
500 LPOR to protect photoautotrophs from photo-oxidative damage.

501 The LPOR genes are more widespread among phototrophic taxa and therefore, it is fair to  
502 interpret that LPOR genes are superior to LIPOR enabling plants to survive and grow at  
503 different environmental conditions. LIPOR genes often become redundant, and they are



504 discarded under some environmental circumstances /selection pressure. Gene dispensability  
505 is often inferred by the higher rate of non-synonymous substitution rates and high ratio of  
506 non-synonymous to synonymous substitution. It has been shown previously that ChIL gene of  
507 the gymnosperm *Thuja standishii* has high rate of non-synonymous substitution confirming  
508 its dispensability (Kusumi et al., 2006). Thus, greater selection pressure acted on LIPOR  
509 genes leading to its complete absence from higher gymnosperm, gnetophytes, and  
510 angiosperms (Walmsley et al., 1999; Yamamoto et al., 2017). Taken together these findings  
511 suggest that LPOR genes seem to be to have higher functionality and importance compared to  
512 LIPOR genes in the oxygenic world.

## 513 **7. Structural basis of LPOR function**

514 **7.1 LPOR a short-chain dehydrogenases/reductases superfamily confrère:** LPOR  
515 belongs to a large family of enzymes known as short-chain dehydrogenases/reductases  
516 (SDRs) (Yang and Cheng, 2004; Wilks and Timko, 1995; Moummou et al., 2012). SDR is  
517 part of a large superfamily of enzymes known as the 'RED' (Reductases, Epimerases,  
518 Dehydrogenases) that catalyze a variety of NADP (H) - or NAD(P)+-dependent reactions  
519 (Wilks and Timko, 1995; Oppermann et al., 2003; Moummou et al., 2012) involving hydride  
520 and proton transfer (Hoeven et al., 2016; Archipowa et al., 2018). This is one of the oldest  
521 and most diverse protein families present in prokaryotes and eukaryotes that typically occur  
522 as oligomers (Oppermann et al., 2003; Yang and Cheng, 2004). It has a wide range of  
523 substrates involved in secondary metabolic routes ranging from polyols, retinoids, sterols,  
524 sugars, aromatic compounds, and xenobiotics (Persson et al., 2003). Plant LPORs are  
525 assigned to SDR73C family in the SDR superfamily (Dong et al., 2020).

526 The classical SDR family of proteins containing all oxidoreductases has two domains, one for  
527 binding of the cofactor and another for binding the substrate (Moummou et al., 2012).  
528 Despite the considerably low sequence similarity (15% -30%), SDR family members bear  
529 significant structural similarity such as a common  $\alpha/\beta$  folding pattern with Rossmann fold - a  
530 characteristic of SDR family members (Yang and Cheng, 2004). The Rossmann fold consists  
531 of a central parallel 6-7  $\beta$ -sheet sandwiched by two arrays of 2-3  $\alpha$ -helices on either side  
532 making up  $\alpha\beta\alpha$ -core for NADPH binding (Dong et al., 2020). The Rossmann-fold and a  
533 hydrophobic loop region both are involved in anchoring the enzyme to the membrane  
534 (Moummou et al., 2012). SDRs consist of a one-domain subunit of about 250 amino acids  
535 with the cofactor binding site in the N-terminal part and substrate binding in the C-terminal

536 part. The variable C-terminal segment determines the substrate specificity (Dong et al.,  
537 2020).

538 Other common structural features include a highly conserved active site with a highly  
539 conserved pentapeptide YxxxK in the catalytic motif (YKDSK in LPOR) that participates in  
540 the proper coordination with NADPH and Pchlide binding (Lebedev et al., 2001; Gabruk et  
541 al., 2016). The N terminal contains the conserved sequence (Gly-X-X-X-Gly-X-Gly) in SDR  
542 and GASSGV/LG in all LPORs. This glycine-rich motif is for structural integrity and binding  
543 of the pyrophosphate portion with NADPH (Dong et al., 2020). A key feature of the SDR  
544 superfamily is its catalytically important tetrad Ser-Asn-Tyr-Lys for proton transfer and  
545 stabilization of reaction intermediates. The catalytic triad in (Asn-Ser-Thr-Lys) POR contains  
546 Thr 145 instead of Ser residue (Moummou et al., 2012; Dong et al., 2020). Site-directed  
547 mutagenesis and in vivo analysis confirm that Tyr and Lys are the most conserved at the  
548 catalytic site in all LPOR members and that these are indispensable for the enzymatic  
549 catalytic activity (Wilks and Timko, 1995; Suzuki and Bauer, 1995; Lebedev et al., 2001  
550 Heyes and Hunter, 2002). The Tyr residue acts as a general acid upon deprotonation and  
551 facilitates hydride transfer to or from NAD (P)<sup>+</sup>/H (Ehrig et al., 1994; Lebedev et al., 2001).  
552 The proton at the C-18 position of Pchlide is derived from Tyr and the hydride transferred to  
553 the C-17 position is derived from the pro-S face of NADPH (Heyes and Hunter, 2005;  
554 Archipowa et al., 2018). The mutation of either Tyr 275 or Lys-279 does not completely  
555 abolish the catalytic activity of LPOR. However, mutation of either residue impairs the  
556 formation of the ground state ternary enzyme-substrate complex, indicating their key role in  
557 substrate binding (Dahlin et al., 1999; Heyes and Hunter, 2002). Both residues have multiple  
558 roles in catalysis, involving formation of the ground state ternary enzyme-substrate complex,  
559 stabilization of a Pchlide excited state species and proton transfer to the reaction intermediate  
560 formed after the light reaction (Menon et al., 2009; Dong et al., 2020) (Figure 2).

561 LPOR contains 14 amino acids unique TFT domain that distinguishes LPOR from other  
562 structurally related SDR enzymes (Gabruk et al., 2012). The LPOR homologs are structurally  
563 conserved with sequence identities of about 54% - 65% between higher plant, cyanobacterial  
564 and algal enzymes (Suzuki and Bauer, 1995; Li and Timko, 1996; Dahlin et al., 1999). The  
565 secondary structure analysis of LPOR by CD spectroscopy shows 33% alpha-helix, 19%  
566 beta-sheets, 20% turn, and 28% random coil (Birve et al., 1996).

567 **7.2. Crystal structure of LPOR:** Crystal structure of LPORs in their free form (Zhang et  
568 al., 2019) and complexed with NADPH have been solved from *Thermosynechococcus*  
569 *elongatus* and *Synechocystis* sp. PCC 6803 at 1.3 Å – 2.4 Å resolution (Zhang et al., 2019;  
570 Dong et al., 2020). The above studies highlight the potential importance of hydrogen-bonding  
571 networks involving the interaction of LPOR active site residues and Pchl<sub>a</sub>. The general  
572 scaffold of protein remains similar to the typical  $\alpha\beta\alpha$ -topology with a central  $\beta$ -sheet. The  
573 crystallographic studies of LPOR demonstrate an 8 $\beta$ -sheet consisting of strands  $\beta$  3- $\beta$  2-  $\beta$  1-  
574  $\beta$  4-  $\beta$  5-  $\beta$  6-  $\beta$  7-  $\beta$  8, the latter being antiparallel. The  $\beta$ -sheets are surrounded by 6  $\alpha$ -  
575 helices, ( $\alpha$ A,  $\alpha$  B,  $\alpha$  H) on one side and ( $\alpha$ C,  $\alpha$  D,  $\alpha$  F) on the other (Dong et al., 2020).

576 The LPOR homologs of *Synechocystis* and *T. elongatus* contain four evolutionarily conserved  
577 cysteine residues; Cys38, Cys89, Cys199, and Cys226 around the active site implicated in  
578 Pchl<sub>a</sub> binding and catalysis. Cys-38 and Cys-89 locate at the ends of  $\beta$ 2 and  $\beta$ 4,  
579 respectively, and Cys-199 locates within  $\alpha$ F (Silva, 2014; Dong et al., 2020). Cys 226 is in  
580 the loop between  $\beta$ 6 and  $\alpha$ G and is found to be essential for LPOR membrane interaction.  
581 During the proton relay pathway through the catalytic tetrad abundant intermolecular polar  
582 interactions take place among NADPH, LPOR, and surrounding water molecules with the  
583 help of functional groups and backbone atoms to stabilize the cofactor (Dong et al., 2020).

584 Near the nicotinamide end, a clam-shaped cavity is formed by predominantly hydrophobic  
585 and aromatic residues consisting of Leu232, Phe233, His236, Tyr237, Phe240, Phe243, and  
586 Phe246 etc (Dong et al., 2020) (Fig 3. Near here). The extra loop of 33 amino acid segments  
587 uniquely present in LPOR and absent in other SDR enzyme superfamily members overlaps  
588 with certain fragments of the clam-shaped cavity. It participates in Pchl<sub>a</sub> binding,  
589 formation of pigment-complexed POR aggregates and Chl<sub>a</sub> release (Birve et al., 1996;  
590 Reinbothe et al., 2003; Sameer et al., 2021). The LPOR oligomerization takes place upon  
591 Pchl<sub>a</sub> binding which brings about the interaction of the hydrophobic residues and  
592 intermolecular interactions in the two distally located lid regions in the POR monomer active  
593 site (Gabruk and Mysliwa-Kurdziel, 2015; Zhang et al., 2019, Zhang et al., 2021). It is known  
594 that mostly two long  $\alpha$ -helices are involved in POR oligomerization (Dong et al., 2020). A  
595 POR octamer has been isolated and its structure investigated by cryo-electron microscopy at  
596 7.7 Å resolution. This structure shows that oligomer formation is most likely driven by the  
597 interaction of amino acid residues in the highly conserved lid regions (Zhang et al., 2021).

598 **8. De-etiolation via LPOR:** LPOR was initially isolated and characterized from the etiolated  
599 plastids of monocots such as barley, oat, and rye in the prolamellar bodies (PLB) (Apel et al.,  
600 1980; Roper et al., 1980; Joyard et al., 1990). It is now known that cyanobacterial LPORs are  
601 capable of forming PLBs indicating common features between the cyanobacterial and higher  
602 eukaryotic LPOR enzymes (Masuda et al., 2009). When the seed germinates beneath the  
603 earth in the absence of light i.e., during skotomorphogenesis, LPOR accumulates to high  
604 levels as a macromolecular complex with Pchl<sub>ide</sub> and NADPH in highly organized 3-D  
605 lattice-like membrane structure known as prolamellar bodies (PLBs) inside etioplasts (Ryberg  
606 and Sundqvist, 1982; Solymosi and Schoefs, 2008; 2010). Both the PLBs and PTs are  
607 constituents of the etioplasts which are plastids that have not been exposed to light  
608 (Reinbothe et al., 2010).

609 When etiolated leaves are subjected to a flash of light, the large aggregates of POR–Pchl<sub>ide</sub>–  
610 NADPH ternary complexes are converted to POR–Chl<sub>ide</sub>–NADPH complexes. Such ternary  
611 complexes have higher emission and are slowly dissociated into smaller complexes  
612 accompanied by the progressive release of Chl<sub>ide</sub> from the POR catalytic site. This leads to a  
613 large blue shift in absorption and emission maxima of Chl<sub>ide</sub> and is called the Shibata shift.  
614 The process ends with the formation of Chl<sub>ide</sub> absorbing at 672 nm and emitting at 682 nm  
615 (Chl<sub>ide</sub>682). Crosslinking experiments have shown that Chl<sub>ide</sub> 672-682 is partly composed  
616 of Chl<sub>ide</sub> still bound to POR complexes and partly by Chl<sub>ide</sub> bound to other proteins (Ryberg  
617 et al., 1992; Wiktorsson, 1993). Shibata shift is followed by the formation of photoactive  
618 photosystem II (PSII) units (Franck et al., 1999). The Shibata shift is arrested in extreme  
619 environmental conditions that impair plastid development (El Hamouri et al., 1981; Dalal and  
620 Tripathy, 2012).

621 During plant development in dark, both the photo- and non-photoactive pools of Pchl<sub>ide</sub>  
622 accumulate at different proportions. The Photoreduction of Pchl<sub>ide</sub> to Chl<sub>ide</sub> is mediated by  
623 several short lifetime intermediates, e.g., semi-reduced Pchl<sub>ide</sub> radical species formed by  
624 hydrogen transfer from NADPH (Belyaeva et al., 1988; Lebedev and Timko, 1999) and  
625 characterized by their very low fluorescence yield (Schoefs, 2000). At least three different  
626 spectral forms of Pchl<sub>ide</sub> are recognized in intact tissues based on their fluorescence emission  
627 maximum (in nm): Pchl<sub>ide</sub> F631, the short-wavelength Pchl<sub>ide</sub> form thought to be located in  
628 the tubular lamellae pro-thylakoids bound in a monomeric form to proteins. F644 due to the  
629 association of oligomeric LPOR, and Pchl<sub>ide</sub> F655 due to localization in PLBs with  
630 polymeric LPOR (Böddi et al., 1992, 1993). The fluorescence lifetime of Pchl<sub>ide</sub> measured in

631 plants showed that short- and long-wavelength Pchl<sub>ide</sub> forms have fast (0.3 to 0.8 ns) and  
632 slow (5.1 to 7.1 ns) components with different proportions depending on plant species (Apel  
633 et al., 1980; Sundqvist and Dahlin, 1997; Böddi et al., 1998; Kis-Petik et al., 1999; Mysliwa-  
634 Kurdziel et al., 2003).

635 The main photoactive form present in etiolated plants is Pchl<sub>ide</sub> F655, which after  
636 illumination is converted to Chl<sub>ide</sub> and subsequently to Chl (F682) through the formation of  
637 long wavelength intermediates (Böddi and Franck, 1997; Schoefs et al., 2000). The  
638 reaction consists of 3 distinct steps including an initial light-driven step followed by dark  
639 steps which occur close to or above glass transition temp of proteins. The reduction reaction  
640 occurs at temperatures as low as 193K, and in response to femtosecond manipulation of light  
641 pulses, signifying its biochemical novelty (Heyes and Hunter, 2005; Heyes et al., 2006). As a  
642 result of the light-induced reduction of Pchl<sub>ide</sub>, PLBs disintegrate and the etioplast develops  
643 into the chloroplast. The PTs ultimately transform into well-organized thylakoid membranes  
644 (Oliver and Griffiths, 1982; Ryberg and Sundqvist, 1988). The isoforms of LPOR are present  
645 at different locations of etio-chloroplasts inner membranes (Grzyb et al., 2013; Kowalewska  
646 et al., 2016). After flash illumination, the photoactive Pchl<sub>ide</sub> complex can be regenerated by  
647 reloading with non-photoactive Pchl<sub>ide</sub> on a fast time scale with concomitant release of  
648 Chl<sub>ide</sub> (Franck et al., 1999; Schoefs et al., 2000). Long-term illumination (i.e., greater than a  
649 minute) usually converts non-photo-active Pchl<sub>ide</sub> to photo-active Pchl<sub>ide</sub>.

650 The spectrally different forms of Pchl<sub>ide</sub> in etioplast are attributed to the formation of  
651 different size aggregates of LPOR and NADPH. LPORs from different organisms can adopt a  
652 variety of soluble oligomeric forms ranging from monomers in cyanobacteria to higher-order  
653 oligomers in plant enzymes (Gabruk and Mysliwa-Kurdziel, 2015; Gabruk et al., 2015).  
654 Pchl<sub>ide</sub> binding leads to a structural reorganization in the POR enzyme, which in turn induces  
655 an interaction of POR monomers (Böddi et al., 1989). POR aggregates account for  
656 approximately 95% of total protein in PLBs. LPOR dimerization is not conserved for  
657 cyanobacteria species such as SyLPOR and TeLPOR (Dong et al., 2020). In contrast,  
658 oligomerization is better conserved in higher plants; species-specific amino acid residues  
659 mediate the oligomerization of LPOR. In *Arabidopsis thaliana* residues 85–88 and 240–270  
660 regions are implicated to participate in oligomerization (Gabruk et al., 2016). Glycerolipids  
661 monogalactosyl diacylglycerol (MGSG), digalactosyl diacylglycerol (DGDG) and sulfosyl  
662 quinoline diacylglycerol (SQDG) account for a total of 80-20 % of the total lipids in the  
663 thylakoids membrane (Solymosi and Schoefs, 2010; Gabruk et al., 2017; Fujii et al., 2017;

664 2018; Gabruk and Mysliwa-Kurdziel, 2020; Heyes et al., 2021). These lipids play an  
665 important role in the aggregation of the Pchl<sub>ide</sub>-LPOR-NADPH complexes, and membrane  
666 structure organization in etioplast development (Kobayashi, 2016; Heyes et al., 2021).

667 There is a possibility of the presence of species-specific motifs in plant LPORs within the  
668 oligomerization region. Numerous studies on leaves and isolated plastids indicate that  
669 Pchl<sub>ide</sub>: LPOR: NADPH aggregates interact with the lipids of PLB and are responsible for  
670 light-triggered PLB dispersion (Engdahl et al., 2001; Gabruk et al., 2017; Fujii et al., 2017;  
671 Gabruk and Mysliwa-Kurdziel, 2020). The exact mechanisms for these processes, however,  
672 are still elusive (Gabruk and Mysliwa-Kurdziel, 2020). Prokaryotic LPORs from *Gloeobacter*  
673 *violaceus* PCC7421 and *Synechocystis* sp PCC6803 could successfully restore characteristic  
674 PLB structures in LPORA knockout mutant of *A. thaliana* even though the size and structure  
675 of PLBs were normal, there was a lower ratio of photoactive to non-photoactive Pchl<sub>ide</sub>  
676 (Masuda et al., 2009). LPOR overexpression studies in LPOR deficient cyanobacterium in  
677 the dark show the formation of PLB-like ultra-structures in dark. These studies clearly show  
678 the intrinsic capability of LPOR to trigger PLBs formation irrespective of its origin in  
679 phototrophs (Yamamoto et al., 2020).

## 680 **9. LPOR diversity and phylogeny**

681 LPOR contains multiple isoforms that exhibit differential subcellular localization, expression  
682 pattern, mRNA stability, plastid import pathway and response to light. Although LPOR  
683 proteins were known since a long time, the genes coding PORA and PORB were first  
684 identified in *A. thaliana* and *H. vulgare* (Reinbothe et al., 1996). Since then, LPOR sequences  
685 have been discovered in a number of phototrophs. In higher plant LPOR isoforms show  
686 >70% sequence identity for the precursor polypeptides and >80% sequence identity for the  
687 mature proteins. The transit peptide region at the N terminal which is not a part of the mature  
688 enzyme shows lowest homology (Dong et al., 2020).

689 In gymnosperms LPOR is encoded by a large multigene family, for instance eleven copies of  
690 PORB and two copies of PORA have been identified in (Loblolly pine) *Pinus taeda*, *Pinus*  
691 *mungo*, *Pinus strobus* (Spano et al., 1992; Forreiter and Apel, 1993, Skinner and Timko  
692 ,1998, 1999). The function, mechanism, and localization of different LPOR isoforms have  
693 been studied and it varies in different tissues during different developmental stages (Masuda  
694 and Takamiya, 2004). *A. thaliana* contains three LPOR isoforms (AtPORA, AtPORB, and  
695 AtPORC) (Reinbothe et al., 2010; Sousa et al., 2013; Masuda and Takamiya, 2004; Oosawa

696 et al., 2000; Benli et al., 1991; Armstrong et al., 1995; Su et al., 2001, Pattanayak and  
697 Tripathy, 2002). *Zea mays* contains PORA and two PORB orthologs PORB1 and PORB2,  
698 latter promoting tocopherol biosynthesis post anthesis. Two POR isoforms are found in  
699 *Nicotiana tabacum* (Masuda and Takamiya, 2004), *Lycopersicon esculentum* (Masuda and  
700 Takamiya, 2004), *Zea mays* (Horton and Leech, 1975), *Oryza sativa* (Sakuraba et al., 2013;  
701 Kwon et al., 2017), *Hordeum vulgare* (Apel et al., 1980; Apel, 1981; Schulz et al., 1989;  
702 Holtorf et al., 1995), ornamental plant *Amaranthus tricolor* (Iwamoto et al., 2001) and several  
703 other species. A single LPOR gene has been detected in *Synechocystis* sp.strain PCC6803  
704 (Suzuki and Bauer,1995; Fujita et al., 1998; Rowe and Griffiths, 1995; Kaneko et al., 1996) ,  
705 *Plectonema boryanum* (Fujita et al., 1998) , *Phormidium lamonosum* (Fujita et al., 1998;  
706 Rowe and Griffiths, 1995), *Chlamydomonas reinhardtii* ( Li and Timko, 1996), *Marchantia*  
707 *paleacea* (Takio et al., 1998), *Pisum sativum* (Spano et al., 1992), *Triticum aestivum* (Teakle  
708 and Griffiths, 1993; Masuda and Takamiya, 2004; Schoefs and Franck, 2003) , *Avena sativa*  
709 (Darrah et al., 1990; Klement et al., 1999), *Musa* (Coemans et al., 2005) and *Cucumis sativus*  
710 (Yoshida et al., 1995;Fusada et al., 2000). PORA is exclusively expressed in etiolated  
711 seedlings and its mRNA abundance and its expression declines rapidly upon illumination in  
712 *Hordeum vulgare* and several other species (Armstrong et al., 1995; Reinbothe and  
713 Reinbothe, 1996; Runge et al., 1996; Masuda et al., 2003; Garrone et al., 2015). PORA is  
714 light-sensitive, and it majorly accumulates during skotomorphogenesis and plays a critical  
715 role in the etioplast development and photomorphogenesis (Paddock et al., 2012; Gabruk and  
716 Mysliwa-Kurdziel, 2015). Overexpression studies of PORA in porB-1 porC-1 double mutant  
717 restore the Chl synthesis at varying light intensities indicating that transiently active PORA  
718 might be capable of functioning at a range of light intensities (Paddock et al., 2010). In  
719 essence, PORA expression is negatively regulated on exposure to light. PORA evolved  
720 mostly to protect etiolated seedlings from Pchl<sub>a</sub>-sensitized singlet oxygen-induced  
721 photooxidative damage.

722 In contrast, PORB transcripts are majorly present in thylakoid membranes in young dark-  
723 grown seedlings and in illuminated seedlings. PORB concentration remains unaffected during  
724 the change of illumination conditions from dark to light (Lebedev and Timko, 1999; Ha et al.,  
725 2017; Buhr et al., 2017). PORB is present right from the seedling development to throughout  
726 the life of the plant in mature tissues. PORB closely resembles PORA but there are  
727 significant differences between the two enzymes with respect to gene expression,  
728 requirements for import of the precursor into the chloroplast and stability in light. Thus, PORA

729 and PORB have unique functions in etiolated seedlings and at the onset of greening  
730 (Aronsson et al., 2000; Masuda et al., 2003; Dahlin et al., 1999, Pattanayak and Tripathy,  
731 2002, 2011).

732 PORC mostly evolved in Brassicales is additionally light indulgent than either PORA or  
733 PORB. PORC is expressed in a light intensity dependent manner, being highly expressed in  
734 high light (Oosawa et al., 2000; Su et al., 2001; Pattanayak and Tripathy, 2002). PORC  
735 mRNA accumulates only after illumination in etiolated seedlings and is predominantly  
736 detected in fully matured green tissues during development and throughout the life of the  
737 plant (Su et al., 2001; Pattanayak and Tripathy 2002, 2011; Paddock et al., 2010). Despite the  
738 physiological equivalence and a perceived redundancy in PORB and PORC functions in  
739 mature plants under normal growth conditions it is seen that PORC is differentially regulated  
740 and is not under circadian control like PORB. The PORC transcripts are positively regulated  
741 by increasing intensity of light while PORB mRNA decreased partially under high light  
742 conditions in *Arabidopsis*. Thus, PORB although constitutively active from the seedling stage  
743 to the mature plants it is less active under high light conditions (Masuda et al., 2002).

744 Based on the biochemical analysis and evolutionary studies Gabruk and Mysliwa-Kurziel  
745 2020, proposed two group of LPOR enzymes- a) Z type LPOR - bacterial origin and b) Plant  
746 origin LPOR- S type (AtPORC type active enzymatically active without lipids) and L type  
747 LPOR (are active when bound to lipid membrane).

748 **9.1. Phylogeny of LPOR isoforms:** In the present study we analysed 270 LPOR protein  
749 sequences of AABPs, cyanobacteria, algae, bryophytes, pteridophytes, gymnosperms and  
750 angiosperms along with LPOR sequences from non-photosynthetic organisms having the  
751 characteristic SDR catalytic motif YxxxK and the conserved sequence (Gly-X-X-X-Gly-X-  
752 Gly) from the publicly available databases. A Maximum likelihood phylogenetic tree was  
753 constructed with Mega 7 software after aligning the sequences with MUSCLE multi-  
754 sequence alignment program (Kumar et al., 2016). The phylogenetic distribution was  
755 inferred using the boot strap method (500 replicates) with WAG (Whelan and Goldman  
756 matrix) and Freq (+F) model. Similar results were obtained when the above LPOR sequences  
757 were analysed by neighbor-joining method and UPMGA (Unweighted pair group method  
758 with arithmetic mean) (Whelan and Goldman, 2001) (Figure 4. Near here).

759 LPOR sequences in the present study have been split into 4 major clades, clade 1 shows a  
760 deep branching radiation representing LPOR sequences from phylum actinomycetota order



761 Actinomycetales, Micrococcales, Mycobacteriales) and fungal division Ascomycota (orders  
762 Incertae sedis, Leotiomyces sodariomyces, Saccharomycetales, Mucorales, Helotiales,  
763 Eurotiales, Mortierellales) interspersed with beta proteobacteria Burkholderia,  $\alpha$ -  
764 cyanobacteria and SAR (Stramenopiles-Heterokonts-Alveolates) supergroup. *Streptomyces*  
765 *sviceus*, *S. davaonensis*, *Lactococcus lactis* subsp. *lactis* lie close to Burkholderiales.  
766 Phaeophycean *Ectocarpus siliculosus* remains close to beta proteobacterial sequences and  
767 fungal LPOR sequences.

768 There is a clear phylogenetic clustering of LPOR sequences from Sporidiobolales,  
769 Chaetothyriales, Mucorales, Schizosaccharomycetales, Saccaromycetales, Pezizales, and  
770 Kickxellales lies closer to beta proteobacterial sequences. Thus, members of Actinomycetota,  
771 Psuedomonadota lie close forming a distinct group. The anaerobic and facultative anaerobic  
772 non photosynthetic bacteria show diversification of LPOR enabled by HGT.

773 LPOR in AAPBs is involved in photoconversion of Bacterioprotochlorophyllide to  
774 Bacteriochlorophyllide. LPOR sequences from Gemmatimonadetes, betaproteobacteria  
775 Limnohabitans, alphaproteobacteria -*Sulfitobater*, *Loktanella* and *Dinoroseobater* lie close to  
776  $\beta$ -cyanobacterial sequences. PORC sequence from algae *Symbiodinium microadriaticum* and  
777 LPOR sequences from chlorophyta, charophyta, bryophytes, marchnatiaphyta, lycophyta  
778 and gymnosperms cluster together closely with a high bootstrap percentage. Consistent with  
779 the previous studies the LPOR of *Gemmatimonadetes* bacterium clusters within beta  
780 proteobacterial LPORs as a sister of Limnohabitans.

781 Presence of LPOR sequences in fungal and other non-photosynthetic bacteria may be a result  
782 of infrequent HGT from photoautotrophs to heterotrophs including bacterial and fungal  
783 pathogens. *Choanephora cucurbitarium* LPOR sequence is in all likelihood transferred from  
784 prokaryotic or eukaryotic phototroph to fungi as a result of overlapping ecological niche or  
785 pathogenic close association (Richards et al., 2009; Tunjić and Korać, 2013; Qiu et al., 2016;  
786 Min et al., 2017). LPOR sequences might be involved in Mycobacterium and fungi in certain  
787 reduction reactions.

788 Clade 2 majorly includes many sequences from  $\beta$ -cyanobacteria, algae and certain  
789 anoxygenic photosynthetic bacteria. The  $\beta$ -cyanobacterial clade remains separated from  $\alpha$   
790 cyanobacterial sequences. SAR LPOR sequences from Gillardia, Cyanidioschyzon merolae,  
791 Chondrus crispus, Gracilariopsis chorda, Porphyra umbilicalis, Symbiodinium  
792 microadriaticum PORA form a distinct group with 98-60 % bootstrap percentage.

793 The placement of AAPBs close to picocyanobacteria suggests these LPOR sequences have  
794 been acquired by AAPBs through HGT from oxygenic phototrophs (Gabruk and Mysliwa-  
795 Kurdziel, 2020; Chernomor et al., 2021). LPOR sequences were transferred from  
796 picocyanobacteria to  $\alpha$  proteobacteria and then transferred to beta proteobacteria (Chernomor  
797 et al., 2021). The LPOR of Gemmatimonadetes cluster with Limnohabitans suggesting a  
798 HGT from Limnohabitans to Gemmatimonadetes.

799 Members of cyanobacteria- *Gloeobacter*, *Cyanothece*, *Hassalia*, *Tolypothrix*, *Limnorphais*,  
800 *Nostoc*, *Chlorogloeopsis*, *Anabaena*, *Microcoleus*, *Oxynema*, *Halomicronema*, *Calothrix*,  
801 *Fremyella diplosiphon*, *Thermosynechococcus elongates*, *Synechocystis*, *Plectonema boryana*  
802, *Synechococcus*, *Cyanobium* form a separate group in clade 2 with 76% bootstrap  
803 percentage. These cyanobacterial species might have evolved LPOR in a certain  
804 environmental niche habitat (Pattanaik et al., 2011).

805 The recent endosymbiont *Paulinella chromatophora* that engulfed alpha cyanobacterium  
806 retained the alpha cyanobacterial LPOR in its chromatophore (Marin et al., 2007; Kim and  
807 Park, 2016; Vedalankar and Tripathy, 2019). However, its nuclear LPOR sequence is closer  
808 to  $\beta$  cyanobacteria *Synechococcus sp. WH5701*, *Cyanobium*, *Plectonema boryanum* and other  
809 species. The presence of LPOR in *P. chromatophora* is a result of HGT from  $\beta$  cyanobacteria  
810 suggesting a polyphyletic origin of POR in *Paulinella* and possibly in several other  
811 organisms. The *Paulinella chromatophora* LPOR sequence closest neighbour are *Marchantia*  
812 *palea* and *Phycomitrella* are positioned on the same branch and their closest neighbour is  
813 *Selaginella*. The PORA and PORB sequences are positioned close to each other but on  
814 separate branches. Amongst angiosperm PORB is closer to PORC sequences.

815 The chromatophore genome is highly reduced, encoding 867 proteins that represent about  
816 one-third of proteins of its free-living counterparts (Nowack et al., 2008). Similar to the  
817 EGTs found in Archaeplastida, *P. chromatophora* has relocated > 70 chromatophore genes  
818 into the nuclear genome (mostly involved in photosynthesis-related functions) (Nowack et  
819 al., 2016; Zhang et al., 2017). By contrast, these genes represent <1% of the *Paulinella*  
820 nuclear genome, while in *A. thaliana* some reports have suggested that the genes of  
821 cyanobacterial origin can account for upto 18% of the nuclear genes (Martin et al., 2002).

822 The clade 3 and 4 mostly includes eukaryotic LPOR sequences from angiosperms consistent  
823 with the other LPOR phylogenetic studies. The angiospermic LPOR sequences are distinctly  
824 divided into–eudicots and monocots. Monocots members from Poales, Arecales, Zingiberales

825 and asparagales lie close together. *Musa acuminata* LPOR lies close to *Zingiber officinale*  
826 with a 62% bootstrap percentage. Poales form a distinct group with 88% bootstrap  
827 percentage. All the monocot sequences are placed in between two distinct dicot groups.

828 Eudicots group - Brassicales, rosales, myrtales, malpighiales, malvales, gentianales, lamiales,  
829 solanales, caryophyllales, fabales, rosales, apiales, saxifragales, asterales, ranunculales,  
830 vitales, cucurbitales, ericales, fagales, malvales, oxalidales, celastrales, proteales, sapindales  
831 lie close together forming one separate group of eudicots. Certain members of lamiales,  
832 gentianales, solanales, saxifragales, ericales, fagales, cucurbitales, sapindales, asterales,  
833 cornales and apiales from the second group of eudicots. PORA and PORB sequences are  
834 clustered together whereas PORC sequence form a completely distinct subgroup among  
835 eudicots suggesting a completely different selection pressure that led to their evolution.

836 Most of the sequences analysed distinctly show that despite a great deal of similarity between  
837 the LPOR isoforms. These isoforms form separate nodes with PORC present at a distance  
838 from PORA and PORB suggesting that PORA and PORB must have evolved around the  
839 same time and PORC evolved later as a result of the selection pressure. In this context it is to  
840 note that the wild diploid Brassicales and related hybrids evolved in inhospitable conditions  
841 with abilities to withstand drought, heat, high light and salt stresses (Arias and Pires 2012;  
842 Folk et al., 2020). This explains the evolution of LPOR in Brassicales in PORC gene is  
843 usually expressed in high light conditions (Pattanayak and Tripathy, 2011) to protect plants  
844 from ROS mediated oxidative stress.

845 The duplication events gave rise to LPOR isoforms and independent duplication events  
846 happened in monocots and dicots. The LPOR gene kept duplicating with the diversification  
847 of angiosperm species. Both primary and secondary duplication are responsible for the spread  
848 of LPOR. HGT and EGT have played an exceedingly huge role in forging the evolution of  
849 LPOR in phylogenetically diverse lineages (Gabruk and Mysliwa-Kurdziel, 2020).

## 850 **10. Conclusion**

851 Evolutionary studies validate the premise that cyanobacterial and plant LPORs originated in  
852 the oxygenic Earth about 1.36 bya from a single common ancestor. LPORs originated in the  
853 oxygenic Earth about 1.36 bya from a single common ancestor. The phylogenetic studies  
854 clearly show a deep branching pattern in LPOR with a great degree of similarity between the  
855 PORA and PORB in different taxa suggesting a closer relationship between them. PORC  
856 originated in Brassicales in a separate duplication event as a result of unfavourable climatic

857 conditions (Gabruk and Mysliwa-Kurdziel, 2020) to protect plants from environmental  
858 stresses.

859 LPOR is a more evolved Pchlide reducing enzyme and loss of LIPOR gene from several  
860 eukaryotic lineages clearly show the importance of LPOR in synthesis of chlorophyll,  
861 phytochrome mediated developmental processes and protection of plants from ROS induced  
862 oxidative stress. Climatic conditions of increasing oxygen tension in atmosphere, high light,  
863 high temp, drought, heat along with nutrient status led to multiple gene losses and gene  
864 duplication events that played a big role in the current distribution of LIPOR and LPOR. The  
865 evolution of LPOR paved way for the loss of LIPOR from highly evolved photosynthetic  
866 organisms. The exclusive inheritance of LPOR in angiosperms is a result of differential  
867 plastidic LIPOR gene loss. The coexistence of LIPOR and LPOR ensures that there is a  
868 continuous supply of chlorophyll under altered (light, oxygen, temperature and other  
869 environmental conditions.

870 It would be a challenge to determine if LIPOR and LPOR originated from a common  
871 ancestral prokaryote. The distribution of LPOR is both a result of chance and contingency  
872 and the relationship between LPOR and LIPOR seem to be less straightforward when looked  
873 through the analysis of a few taxa. Our phylogenetic analysis indicates that LPOR is present  
874 in a wide set of photosynthetic (AABPs, Cyanobacteria, algae, bryophytes, pteridophytes,  
875 gymnosperms, angiosperms) and non-photosynthetic (bacteria and fungi) organisms. LPOR  
876 sequences from non-photosynthetic organisms (actinomycetota, bacillota, ascomycota,  
877 basidiomycota, mucoromycota, Zygomycota, zoopagomycota) lie close to prokaryotic LPOR  
878 sequences. Although no potential functional significance can be assigned to these LPOR,  
879 these might contribute to some other specific physiological role in the lifestyle of the  
880 organism. Phylogenetic incongruence indicates that LPOR genes have been overwhelmingly  
881 horizontally transferred between not only photosynthetic but also non photosynthetic  
882 lineages.

883 In this context it would be interesting to see if the signature SDR motif in the fungi is coding  
884 for functions yet to be understood. The identification of the function of these LPOR  
885 sequences would give us a clue to the LPOR migration and evolution. Many more cases of  
886 intra and interphylum HGT events that are yet to be discovered will shed better light on the  
887 evolution of protochlorophyllide oxidoreductase.

888

889 **Acknowledgment**

890 We are thankful to the authors and the journal, Proceedings of National Academy of  
891 Sciences, USA for allowing us to use crystallographic structure of cyanobacterial light-  
892 dependent protochlorophyllide oxidoreductase (Dong CS, Zhang WL, Wang Q, Li YS, Wang  
893 X, Zhang M and Liu L (2020) Crystal structures of cyanobacterial light-dependent  
894 protochlorophyllide oxidoreductase. Proceedings of the National Academy of Sciences  
895 117(15):8455-8461.)

896 **Conflict of interest.**

897 The authors declare no conflict of interest.

898 **Funding** This work was supported by the Department of Science and Technology (SERB-  
899 EMR/2016/004976).



## References

- Abbas, M., Sharma, G., Dambire, C., Marquez, J., Alonso-Blanco, C., Proaño, K. and Holdsworth, M.J. 2022. An oxygen-sensing mechanism for angiosperm adaptation to altitude. *Nature*.1-5. <https://doi.org/10.1038/s41586-022-04740-y>
- Adamson, H.Y., Hiller, R.G. and Walmsley, J. 1997. Protochlorophyllide reduction and greening in angiosperms: an evolutionary perspective. *J. Photochem. Photobiol. B: Biol.* 41:201-221. [https://doi.org/10.1016/S1011-1344\(97\)00105-X](https://doi.org/10.1016/S1011-1344(97)00105-X)
- Apel, K. 1981. The Protochlorophyllide Holochrome of Barley (*Hordeum Vulgare* L.) Phytochrome-Induced Decrease of Translatable mRNA Coding for the NADPH: Protochlorophyllide Oxidoreductase. *Eur. J. Biochem.* 120:89-93. <https://doi.org/10.1111/j.1432-1033.1981.tb05673.x>
- Apel, K., Santel, H.J., Redlinger, T.E. and Falk, H. 1980. The protochlorophyllide holochrome of barley (*Hordeum vulgare* L.) Isolation and characterization of the NADPH: protochlorophyllide oxidoreductase. *Eur. J. Biochem.* 111:251-258. <https://doi.org/10.1111/j.1432-1033.1980.tb06100.x>
- Archibald, J.M. 2009. The puzzle of plastid evolution. *Curr. Biol.* 19:R81-R88. <https://doi.org/10.1016/j.cub.2008.11.067>
- Archibald, J.M. 2015. Genomic perspectives on the birth and spread of plastids. *Proc. Natl. Acad. Sci. U.S.A.* 112:10147-10153. <https://doi.org/10.1073/pnas.1421374112>
- Archibald, J.M. and Keeling, P.J. 2002. Recycled plastids: a 'green movement' in eukaryotic evolution. *Trends Genet.* 18:577-584. [https://doi.org/10.1016/S0168-9525\(02\)02777-4](https://doi.org/10.1016/S0168-9525(02)02777-4)
- Archipowa, N., Kutta, R.J., Heyes, D.J. and Scrutton, N.S. 2018. Stepwise hydride transfer in a biological system: insights into the reaction mechanism of the light-dependent protochlorophyllide oxidoreductase. *Angew. Chem.* 130:2712-2716. <https://doi.org/10.1002/ange.201712729>
- Arias, T. and Pires, J.C. 2012. A fully resolved chloroplast phylogeny of the brassica crops and wild relatives (Brassicaceae: Brassiceae): Novel clades and potential taxonomic implications. *Taxon.* 61:980-988. <https://doi.org/10.1002/tax.615005>
- Armbrust, E.V., Berges, J.A., Bowler, C., Green, B.R., Martinez, D., Putnam, N.H., Zhou, S., Allen, A.E., Apt, K.E., Bechner, M. and Brzezinski, M.A. 2004. The genome of the diatom

Thalassiosira pseudonana: ecology, evolution, and metabolism. *Science*. 306:79-86.  
<https://doi.org/10.1126/science.1101156>

Armstrong, G.A. 1998. Greening in the dark: light-independent chlorophyll biosynthesis from anoxygenic photosynthetic bacteria to gymnosperms. *J. Photochem. Photobiol. B: Biol.* 43:87-100. [https://doi.org/10.1016/S1011-1344\(98\)00063-3](https://doi.org/10.1016/S1011-1344(98)00063-3)

Armstrong, G.A., Runge, S., Frick, G., Sperling, U. and Apel, K. 1995. Identification of NADPH: protochlorophyllide oxidoreductases A and B: a branched pathway for light-dependent chlorophyll biosynthesis in *Arabidopsis thaliana*. *Plant Physiol.* 108:1505-1517.  
<https://doi.org/10.1104/pp.108.4.1505>

Aronsson, H., Sohr, K. and Soll, J. 2000. NADPH: protochlorophyllide oxidoreductase uses the general import route into chloroplasts. *Biol. Chem.* 1263-1267  
<https://doi.org/10.1515/BC.2000.155>

Battersby, T.A. 2000. The Pigments of Life. *Nat. Prod. Rep.* 17:507.  
<https://doi.org/10.1039/b002635m>

Bauer, C.E., Bollivar, D.W. and Suzuki, J.Y. 1993. Genetic analyses of photopigment biosynthesis in eubacteria: a guiding light for algae and plants. *J. Bacteriol.* 175:3919-3925.  
<https://doi.org/10.1128/jb.175.13.3919-3925.1993>

Beale, S.I., 1999. Enzymes of chlorophyll biosynthesis. *Photosynth. Res.* 60:43-73.  
<https://doi.org/10.1023/A:1006297731456>

Begley, T.P. 1994. Photoenzymes: a novel class of biological catalysts. *Acc. Chem. Res.* 27:394-401. <https://doi.org/10.1021/ar00048a002>

Behrenfeld, M.J., Worthington, K., Sherrell, R.M., Chavez, F.P., Strutton, P., McPhaden, M. and Shea, D.M. 2006. Controls on tropical Pacific Ocean productivity revealed through nutrient stress diagnostics. *Nature*. 442:1025-1028. <https://doi.org/10.1038/nature05083>

Benli, M., Schulz, R. and Apel, K. 1991. Effect of light on the NADPH-protochlorophyllide oxidoreductase of *Arabidopsis thaliana*. *Plant Mol Biol.* 16: 615-625.  
<https://doi.org/10.1007/bf00023426>

Biebl, H., Allgaier, M., Tindall, B.J., Koblizek, M., Lünsdorf, H., Pukall, R. and Wagner-Döbler, I. 2005. *Dinoroseobacter shibae* gen. nov., sp. nov., a new aerobic phototrophic



bacterium isolated from dinoflagellates. *Int. J. Syst. Evol. Microbiol.* 55:1089-1096.  
<https://doi.org/10.1099/ijs.0.63511-0>

Birchler, J.A. and Yang, H. 2022. The multiple fates of gene duplications: deletion, hypofunctionalization, subfunctionalization, neofunctionalization, dosage balance constraints, and neutral variation. *Plant Cell.* 34:2466–2474 <https://doi.org/10.1093/plcell/koac076>

Birve, S.J., Selstam, E. and Johansson, L.B.Å. 1996. Secondary structure of NADPH: protochlorophyllide oxidoreductase examined by circular dichroism and prediction methods. *Biochem. J.* 317:549-555. <https://doi.org/10.1042/bj3170549>

Björn, L.O. 2009. The evolution of photosynthesis and chloroplasts. *Curr. Sci.* 1466-1474.

Björn, L.O. 2018. Photoenzymes and related topics: an update. *J. Photochem. Photobiol.* 94:459-465. <https://doi.org/10.1111/php.12892>

Blankenship, R.E. and Hartman, H. 1998. The origin and evolution of oxygenic photosynthesis. *Trends Biochem. Sci.* 23:94-97. [https://doi.org/10.1016/s0968-0004\(98\)01186-4](https://doi.org/10.1016/s0968-0004(98)01186-4)

Blankenship., RE. Early evolution of photosynthesis. *Plant Physiol.* 2010. 154:434-8.  
<https://doi.org/10.1104/pp.110.161687>

Bock, R. 2010. The give-and-take of DNA: horizontal gene transfer in plants. *Trends Plant Sci.* 15:11-22. <https://doi.org/10.1016/j.tplants.2009.10.001>

Böddi, B. and Franck, F. 1997. Room temperature fluorescence spectra of protochlorophyllide and chlorophyllide forms in etiolated bean leaves. *J. Photochem. Photobiol. B: Biol.* 41:73-82. [https://doi.org/10.1016/S1011-1344\(97\)00084-5](https://doi.org/10.1016/S1011-1344(97)00084-5)

Böddi, B., Kis-Petik, K., Kaposi, A.D., Fidy, J. and Sundqvist, C. 1998. The two spectroscopically different short wavelength protochlorophyllide forms in pea epicotyls are both monomeric. *Biochim Biophys Acta Bioenerg.* 1365:531-540.  
[https://doi.org/10.1016/S0005-2728\(98\)00106-6](https://doi.org/10.1016/S0005-2728(98)00106-6)

Böddi, B., Lindsten, A., Ryberg, M. and Sundqvist, C. 1989. On the aggregational states of protochlorophyllide and its protein complexes in wheat etioplasts. *Physiol Plant.* 76:135-143.  
<https://doi.org/10.1111/j.1399-3054.1989.tb05622.x>

- Böddi, B., Ryberg, M. and Sundqvist, C. 1992. Identification of four universal protochlorophyllide forms in dark-grown leaves by analyses of the 77 K fluorescence emission spectra. *J. Photochem. Photobiol. B: Biol.* 12:389-401. [https://doi.org/10.1016/1011-1344\(92\)85043-T](https://doi.org/10.1016/1011-1344(92)85043-T)
- Böddi, B., Ryberg, M. and Sundqvist, C. 1993. Analysis of the 77 K fluorescence emission and excitation spectra of isolated etioplast inner membranes. *J. Photochem. Photobiol. B: Biol.* 21:125-133. [https://doi.org/10.1016/1011-1344\(93\)80174-8](https://doi.org/10.1016/1011-1344(93)80174-8)
- Boivin, R., Richard, M., Beauseigle, D., Bousquet, J. and Bellemare, G. 1996. Phylogenetic Inferences from Chloroplast chlB Gene Sequences of *Nephrolepis exaltata* (Filicopsida), *Ephedra altissima* (Gnetopsida), and Diverse Land Plants. *Mol. Phylogenet. Evol.* 6:19-29. <https://doi.org/10.1006/mpev.1996.0054>
- Bollivar, D.W. 2006. Recent advances in chlorophyll biosynthesis. *Photosynth. Res.* 90:173-194. <https://doi.org/10.1007/s11120-006-9076-6>
- Bordowitz, J.R. and Montgomery, B.L. 2008. Photoregulation of cellular morphology during complementary chromatic adaptation requires sensor-kinase-class protein RcaE in *Fremyella diplosiphon*. *J. Bacteriol.* 190:4069-4074. <https://doi.org/10.1128/jb.00018-08>
- Bowler, C., Vardi, A. and Allen, A.E. 2010. Oceanographic and biogeochemical insights from diatom genomes. *Annu Rev Mar Sci.* 2:333-365. <https://doi.org/10.1146/annurev-marine-120308-081051>
- Breznenová, K., Demko, V., Pavlovič, A., Gálová, E., Balážová, R. and Hudák, J. 2010. Light-independent accumulation of essential chlorophyll biosynthesis- and photosynthesis-related proteins in *Pinus mugo* and *Pinus sylvestris* seedlings. *Photosynthetica.* 48:16-22.
- Brinkmann, H., Göker, M., Koblížek, M., Wagner-Döbler, I. and Petersen, J. 2018. Horizontal operon transfer, plasmids, and the evolution of photosynthesis in Rhodobacteraceae. *ISME J.* 12:1994-2010. <https://doi.org/10.1038/s41396-018-0150-9>
- Bröcker, M.J., Schomburg, S., Heinz, D.W., Jahn, D., Schubert, W.D. and Moser, J. 2010. Crystal Structure of the Nitrogenase-like Dark Operative Protochlorophyllide Oxidoreductase Catalytic Complex (ChlN/ChlB) 2\*. *J. Biol. Chem.* 285:27336-27345. <https://doi.org/10.1074/jbc.m110.126698>

Broecker, M.J., Virus, S., Ganskow, S., Heathcote, P., Heinz, D.W., Schubert, W.D., Jahn, D. and Moser, J. 2008. ATP-driven reduction by dark-operative protochlorophyllide oxidoreductase from *Chlorobium tepidum* mechanistically resembles nitrogenase catalysis. *J. Biol. Chem.* 283:10559-10567. <https://doi.org/10.1074/jbc.m708010200>

Bryant, D.A. and Frigaard, N.U. 2006. Prokaryotic photosynthesis and phototrophy illuminated. *Trends Microbiol.* 14:488-496. <https://doi.org/10.1016/j.tim.2006.09.001>

Bryant, D.A., Hunter, C.N. and Warren, M.J. 2020. Biosynthesis of the modified tetrapyrroles the pigments of life. *J. Biol. Chem.* 295:6888-6925. <https://doi.org/10.1074/jbc.rev120.006194>

Brzezowski, P., Richter, A.S. and Grimm, B. 2015. Regulation and function of tetrapyrrole biosynthesis in plants and algae. *Biochim. Biophys. Acta –Bioenerg.* 1847:968-985. <https://doi.org/10.1016/j.bbabi.2015.05.007>

Buhr, F., El Bakkouri, M., Valdez, O., Pollmann, S., Lebedev, N., Reinbothe, S. and Reinbothe, C. 2008. Photoprotective role of NADPH: protochlorophyllide oxidoreductase A. *Proc. Natl. Acad. Sci. U.S.A.* 105:12629-12634. <https://doi.org/10.1073/pnas.0803950105>

Buhr, F., Lahroussi, A., Springer, A., Rustgi, S., von Wettstein, D., Reinbothe, C. and Reinbothe, S. 2017. NADPH: protochlorophyllide oxidoreductase B (PORB) action in *Arabidopsis thaliana* revisited through transgenic expression of engineered barley PORB mutant proteins. *Plant Mol. Biol.* 94:45-59. <https://doi.org/10.1007/s11103-017-0592-x>

Buick, R. 2008. When did oxygenic photosynthesis evolve?. *Philos. Trans. R. Soc. B: Biol. Sci.* 363:2731-2743. <https://doi.org/10.1098/rstb.2008.0041>

Burke, D.H., Alberti, M. and Hearst, J.E. 1993a. The *Rhodobacter capsulatus* chlorin reductase-encoding locus, *bchA*, consists of three genes, *bchX*, *bchY*, and *bchZ*. *J. Bacteriol.* 175:2407-2413. <https://doi.org/10.1128/jb.175.8.2407-2413.1993>

Burke, D.H., Alberti, M. and Hearst, J.E. 1993b. *bchFNBH* bacteriochlorophyll synthesis genes of *Rhodobacter capsulatus* and identification of the third subunit of light-independent protochlorophyllide reductase in bacteria and plants. *J. Bacteriol.* 175:2414-2422. <https://doi.org/10.1128/jb.175.8.2414-2422.1993>

Burki, F. 2017. The convoluted evolution of eukaryotes with complex plastids. In *Adv. Bot. Res.* Academic Press. 84:1-30 <https://doi.org/10.1016/bs.abr.2017.06.001>

- Cardona, T. 2019. Thinking twice about the evolution of photosynthesis. *Open Biol.* 9:180246. <https://doi.org/10.1098/rsob.180246>
- Carey, E.E., Tripathy, B.C. and Rebeiz, C.A. 1985. Chloroplast biogenesis 51: Modulation of monovinyl and divinyl protochlorophyllide biosynthesis by light and darkness in vitro. *Plant Physiol.* 79:1059-1063. <https://doi.org/10.1104/pp.79.4.1059>
- Castelfranco, P.A. and Beale, S.I. 1983. Chlorophyll biosynthesis: recent advances and areas of current interest. *Ann. Rev. Plant Physiol.* 34:241-276.
- Cavalier-Smith, T. 1998. A revised six-kingdom system of life. *Biol. Rev.* 73:203-266. <https://doi.org/10.1017/s0006323198005167>
- Chakraborty, N. and Tripathy, B.C. 1992. Involvement of singlet oxygen in 5-aminolevulinic acid-induced photodynamic damage of cucumber (*Cucumis sativus* L.) chloroplasts. *Plant Physiol.* 98:7-11. <https://doi.org/10.1104/pp.98.1.7>
- Chan, C.X. and Bhattacharya, D. 2010. The origin of plastids. *Nat. Educ.* 3:84-1.
- Chen, M., Schliep, M., Willows, R.D., Cai, Z.L., Neilan, B.A. and Scheer, H. 2010. A red-shifted chlorophyll. *Science.* 329:1318-1319. <https://doi.org/10.1126/science.1191127>
- Chernomor, O., Peters, L., Schneidewind, J., Loeschcke, A., Knieps-Grünhagen, E., Schmitz, F., von Lieres, E., Kutta, R.J., Svensson, V., Jaeger, K.E. and Drepper, T. 2021. Complex evolution of light-dependent protochlorophyllide oxidoreductases in aerobic anoxygenic phototrophs: origin, phylogeny, and function. *Mol. Biol. Evol.* 38:819-837. <https://doi.org/10.1093/molbev/msaa234>
- Coemans, B., Matsumura, H., Terauchi, R., Remy, S., Swennen, R. and Sagi, L. 2005. SuperSAGE combined with PCR walking allows global gene expression profiling of banana (*Musa acuminata*), a non-model organism. *Theor. Appl. Genet.* 111:1118-1126. <https://doi.org/10.1007/s00122-005-0039-7>
- Cohen, O., Gophna, U. and Pupko, T. 2011. The complexity hypothesis revisited: connectivity rather than function constitutes a barrier to horizontal gene transfer. *Mol. Biol. and Evol.* 28:1481-1489. <https://doi.org/10.1093/molbev/msq333>
- Colp, M.J. and Archibald, J.M. 2020. The language of symbiosis: Insights from protist biology. In: Bosch, T.C. and Hadfield, M.G. editors. *Cellular dialogues in the holobiont*. CRC Press. p. 17-3.

Curtis, B.A., Tanifuji, G., Burki, F., Gruber, A., Irimia, M., Maruyama, S., Arias, M.C., Ball, S.G., Gile, G.H., Hirakawa, Y. and Hopkins, J.F. 2012. Algal genomes reveal evolutionary mosaicism and the fate of nucleomorphs. *Nature*. 492:59-65. <https://doi.org/10.1038/nature11681>

Cvetkovska, M., Orgnero, S., Hüner, N.P. and Smith, D.R. 2019. The enigmatic loss of light-independent chlorophyll biosynthesis from an Antarctic green alga in a light-limited environment. *New Phytologist*. 222:651-656. <https://doi.org/10.1111/nph.15623>

Dahlin, C., Aronsson, H., Wilks, H.M., Lebedev, N., Sundqvist, C. and Timko, M.P. 1999. The role of protein surface charge in catalytic activity and chloroplast membrane association of the pea NADPH: protochlorophyllide oxidoreductase (POR) as revealed by alanine scanning mutagenesis. *Plant Mol. Biol.* 39:309-323. <https://doi.org/10.1023/a:1006135100760>

Dalal, V.K. and Tripathy, B.C. 2012. Modulation of chlorophyll biosynthesis by water stress in rice seedlings during chloroplast biogenesis. *Plant Cell & Environ.* 35:1685-1703. <https://doi.org/10.1111/j.1365-3040.2012.02520.x>

Darrah, P.M., Kay, S.A., Teakle, G.R. and Griffiths, W.T. 1990. Cloning and sequencing of protochlorophyllide reductase. *Biochem. J.* 265:789-798. <https://doi.org/10.1042/bj2650789>

Del Pozo, J.C. and Ramirez-Parra, E. 2015. Whole genome duplications in plants: an overview from Arabidopsis. *J. Exp. Bot.* 66:6991-7003. <https://doi.org/10.1093/jxb/erv432>

Dong, C.S., Zhang, W.L., Wang, Q., Li, Y.S., Wang, X., Zhang, M. and Liu, L. 2020. Crystal structures of cyanobacterial light-dependent protochlorophyllide oxidoreductase. *Proc. Natl. Acad. Sci. U.S.A.* 117:8455-8461. <https://doi.org/10.1073/pnas.1920244117>

Duggan, J.X. and Rebeiz, C.A. 1982. Chloroplast biogenesis. 42. Conversion of divinyl chlorophyllide a to monovinyl chlorophyllide a in vivo and in vitro. *Plant Sci. Lett.* 27: 137-145. [https://doi.org/10.1016/0304-4211\(82\)90142-0](https://doi.org/10.1016/0304-4211(82)90142-0)

Durnford, D.G. and Falkowski, P.G. 1997. Chloroplast redox regulation of nuclear gene transcription during photoacclimation. *Photosyn. Res.* 53:229-241. <https://doi.org/10.1023/A:1005815725371>

- Dutta, S., Mohanty, S. and Tripathy, B.C. 2009. Role of temperature stress on chloroplast biogenesis and protein import in pea. *Plant Physiol.* 150:1050-1061. <https://doi.org/10.1104/pp.109.137265>
- El Hamouri, B., Brouers, M. and Sironval, C. 1981. Pathway from photoinactive P633– 628 protochlorophyllide to the P696– 682 chlorophyllide in cucumber etioplast suspensions. *Plant Sci. Lett.* 21:375-379. [https://doi.org/10.1016/0304-4211\(81\)90111-5](https://doi.org/10.1016/0304-4211(81)90111-5)
- Engdahl, S., Aronsson, H., Sundqvist, C., Timko, M.P. and Dahlin, C. 2001. Association of the NADPH: protochlorophyllide oxidoreductase (POR) with isolated etioplast inner membranes from wheat. *Plant J.* 27:297-304. <https://doi.org/10.1046/j.1365-313x.2001.01094.x>
- Folk, R.A., Siniscalchi, C.M. and Soltis, D.E. 2020. Angiosperms at the edge: Extremity, diversity, and phylogeny. *Plant Cell Environ.* 43:2871-2893. <https://doi.org/10.1111/pce.13887>
- Fong, A. and Archibald, J.M. 2008. Evolutionary dynamics of light-independent protochlorophyllide oxidoreductase genes in the secondary plastids of cryptophyte algae. *Eukaryot. Cell.* 7:550-553. <https://doi.org/10.1128/ec.00396-07>
- Forreiter, C. and Apel, K. 1993. Light-independent and light-dependent protochlorophyllide-reducing activities and two distinct NADPH-protochlorophyllide oxidoreductase polypeptides in mountain pine (*Pinus mugo*). *Planta* 190:536-545. <https://doi.org/10.1007/bf00224793>
- Franck, F., Bereza, B. and Böddi, B. 1999. Protochlorophyllide-NADP<sup>+</sup> and protochlorophyllide-NADPH complexes and their regeneration after flash illumination in leaves and etioplast membranes of dark-grown wheat. *Photosyn. Res.* 59:53-61. <https://doi.org/10.1023/A:1006157610954>
- Fujii, S., Kobayashi, K., Nagata, N., Masuda, T. and Wada, H. 2017. Monogalactosyldiacylglycerol facilitates synthesis of photoactive protochlorophyllide in etioplasts. *Plant Physiol.* 174:2183-2198. <https://doi.org/10.1104/pp.17.00304>
- Fujii, S., Kobayashi, K., Nagata, N., Masuda, T. and Wada, H. 2018. Digalactosyldiacylglycerol is essential for organization of the membrane structure in etioplasts. *Plant Physiol.* 177:1487-1497. <https://doi.org/10.1104/pp.18.00227>

Fujita, Y. 1996. Protochlorophyllide reduction: a key step in the greening of plants. *Plant cell physiol.* 37:411-421. <https://doi.org/10.1093/oxfordjournals.pcp.a028962>

Fujita, Y. and Bauer, C.E. 2000. Reconstitution of light-independent protochlorophyllide reductase from purified BchL and BchN-BchB subunits: in vitro confirmation of nitrogenase-like features of a bacteriochlorophyll biosynthesis enzyme. *J. Biol. Chem.* 275:23583-23588. <https://doi.org/10.1074/jbc.M002904200>

Fujita, Y. and Uesaka, K. 2022. Nitrogen fixation in cyanobacteria. *Cyanobacterial Physiol.* 29-45. <https://doi.org/10.1016/B978-0-323-96106-6.00007-1>

Fujita, Y. and Yamakawa, H. 2017. Biochemistry of chlorophyll biosynthesis in photosynthetic prokaryotes. In: Hallenbeck, P.C. editor. *Modern Topics in the Phototrophic Prokaryotes*. Springer, Cham. p. 67-122. [https://doi.org/10.1007/978-3-319-51365-2\\_3](https://doi.org/10.1007/978-3-319-51365-2_3)

Fujita, Y., Takagi, H. and Hase, T. 1998. Cloning of the gene encoding a protochlorophyllide reductase: the physiological significance of the co-existence of light-dependent and-independent protochlorophyllide reduction systems in the cyanobacterium *Plectonema boryanum*. *Plant cell physiol.* 39:177-185. <https://doi.org/10.1093/oxfordjournals.pcp.a029355>

Fusada, N., Masuda, T., Kuroda, H., Shiraiishi, T., Shimada, H., Ohta, H. and Takamiya, K.I. 2000. NADPH-protochlorophyllide oxidoreductase in cucumber is encoded by a single gene and its expression is transcriptionally enhanced by illumination. *Photosyn. Res.* 64:147-154. <https://doi.org/10.1023/a:1006418608647>

Gabr, A., Grossman, A.R. and Bhattacharya, D. 2020. Paulinella, a model for understanding plastid primary endosymbiosis. *J. Phycol.* 56:837-843. <https://doi.org/10.1111/jpy.13003>

Gabruk, M. and Mysliwa-Kurdziel, B. 2015. Light-dependent protochlorophyllide oxidoreductase: phylogeny, regulation, and catalytic properties. *Biochem.* 54:5255-5262. <https://doi.org/10.1021/acs.biochem.5b00704>

Gabruk, M. and Mysliwa-Kurdziel, B. 2020. The origin, evolution and diversification of multiple isoforms of light-dependent protochlorophyllide oxidoreductase (LPOR): focus on angiosperms. *Biochem. J.* 477:2221-2236. <https://doi.org/10.1042/bcj20200323>

- Gabruk, M., Grzyb, J., Kruk, J. and Mysliwa-Kurdziel, B. 2012. Light-dependent and light-independent protochlorophyllide oxidoreductases share similar sequence motifs—in silico studies. *Photosynthetica* 50:529-540. <https://doi.org/10.1007/s11099-012-0057-z>
- Gabruk, M., Mysliwa-Kurdziel, B. and Kruk, J. 2017. MGDG, PG and SQDG regulate the activity of light-dependent protochlorophyllide oxidoreductase. *Biochem. J.* 474:1307-1320. <https://doi.org/10.1042/bcj20170047>
- Gabruk, M., Nowakowska, Z., Skupien-Rabian, B., Kędracka-Krok, S., Mysliwa-Kurdziel, B. and Kruk, J. 2016. Insight into the oligomeric structure of PORA from *A. thaliana*. *Biochim. Biophys. Acta Proteins Proteomics* 1864:1757-1764. <https://doi.org/10.1016/j.bbapap.2016.09.015>
- Gabruk, M., Stecka, A., Strzałka, W., Kruk, J., Strzałka, K. and Mysliwa-Kurdziel, B. 2015. Photoactive protochlorophyllide-enzyme complexes reconstituted with PORA, PORB and PORC proteins of *A. thaliana*: fluorescence and catalytic properties. *PloS one* 10:p.e0116990. <https://doi.org/10.1371/journal.pone.0116990>
- Garrone, A., Archipowa, N., Zipfel, P.F., Hermann, G. and Dietzek, B. 2015. Plant protochlorophyllide oxidoreductases A and B: catalytic efficiency and initial reaction steps. *J. Biol. Chem.* 290:28530-28539. <https://doi.org/10.1074/jbc.m115.663161>
- Granick, S., and Beale SI. 1978. Hemes, chlorophylls, and related compounds: biosynthesis and metabolic regulation. In *Adv Enzymol Relat Areas Mol Biol.* Vol.46. pascal-francis.inist.fr. p.33-203 <https://doi.org/10.1002/9780470122914.ch2>
- Griffiths, W.T. 1978. Reconstitution of chlorophyllide formation by isolated etioplast membranes. *Biochem. J.* 174:681-692. <https://doi.org/10.1042/bj1740681>
- Grossman, A.R. 2003. A molecular understanding of complementary chromatic adaptation. *Photosyn. Res.* 76:207-215. <https://doi.org/10.1023/a:1024907330878>
- Grzyb, J.M., Solymosi, K., Strzałka, K. and Mysliwa-Kurdziel, B. 2013. Visualization and characterization of prolamellar bodies with atomic force microscopy. *J. Plant Physiol.* 170:1217-1227. <https://doi.org/10.1016/j.jplph.2013.04.017>
- Ha, J.H., Han, S.H., Lee, H.J. and Park, C.M. 2017. Environmental adaptation of the heterotrophic-to-autotrophic transition: the developmental plasticity of seedling



establishment. *CRC Crit. Rev. Plant Sci.* 36:128-137.  
<https://doi.org/10.1080/07352689.2017.1355661>

Hackett, J.D., Yoon, H.S., Soares, M.B., Bonaldo, M.F., Casavant, T.L., Scheetz, T.E., Nosenko, T. and Bhattacharya, D. 2004. Migration of the plastid genome to the nucleus in a peridinin dinoflagellate. *Curr. Biol.* 14:213-218. <https://doi.org/10.1016/j.cub.2004.01.032>

Helsen, J., Voordeckers, K., Vanderwaeren, L., Santermans, T., Tsontaki, M., Verstrepen, K.J. and Jelier, R. 2020. Gene loss predictably drives evolutionary adaptation. *Mol. Biol. Evol.* 37:2989-3002. <https://doi.org/10.1093/molbev/msaa172>

Heyes, D.J. and Hunter, C.N. 2002. Site-directed mutagenesis of Tyr-189 and Lys-193 in NADPH: protochlorophyllide oxidoreductase from *Synechocystis*. *Biochem Soc Trans* 30 : 601–604. <https://doi.org/10.1042/bst0300601>

Heyes, D.J. and Hunter, C.N. 2005. Making light work of enzyme catalysis: protochlorophyllide oxidoreductase. *Trends Biochem. Sci.* 30:642-649. <https://doi.org/10.1016/j.tibs.2005.09.001>

Heyes, D.J., Heathcote, P., Rigby, S.E., Palacios, M.A., van Grondelle, R. and Hunter, C.N. 2006. The first catalytic step of the light-driven enzyme protochlorophyllide oxidoreductase proceeds via a charge transfer complex. *J. Biol. Chem.* 281:26847-26853. <https://doi.org/10.1074/jbc.m602943200>

Heyes, D.J., Zhang, S., Taylor, A., Johannissen, L.O., Hardman, S.J., Hay, S. and Scrutton, N.S. 2021. Photocatalysis as the ‘master switch’ of photomorphogenesis in early plant development. *Nat Plants.* 7:268-276. <https://doi.org/10.1038/s41477-021-00866-5>

Ho, M.Y., Shen, G., Canniffe, D.P., Zhao, C. and Bryant, D.A. 2016. Light-dependent chlorophyll f synthase is a highly divergent paralog of PsbA of photosystem II. *Science.* 353:9178. <https://doi.org/10.1126/science.aaf9178>

Hoeven, R., Hardman, S.J., Heyes, D.J. and Scrutton, N.S. 2016. Cross-species analysis of protein dynamics associated with hydride and proton transfer in the catalytic cycle of the light-driven enzyme protochlorophyllide oxidoreductase. *Biochemistry* 55:903-913. <https://doi.org/10.1021/acs.biochem.5b01355>

Hohmann-Marriott MF., Blankenship RE. 2011. Evolution of photosynthesis. *Annu Rev Plant Biol* 62:515-548. <https://doi.org/10.1146/annurev-arplant-042110-103811>

- Holtorf, H., Reinbothe, S., Reinbothe, C., Bereza, B. and Apel, K. 1995. Two routes of chlorophyllide synthesis that are differentially regulated by light in barley (*Hordeum vulgare* L.). *Proc. Natl. Acad. Sci. U.S.A.* 92:3254-3258. <https://doi.org/10.1073/pnas.92.8.3254>
- Horton, P., and Leech, R.M. 1975. The effect of ATP on the photoconversion of protochlorophyllide in isolated etioplasts of *Zea mays*. *Plant Physiol.* 56:113-120. <https://doi.org/10.1104/pp.56.1.113>
- Huang, W., Wu, Q. and Yu, J. 2004. Contributions of DPOR at low light intensity to chlorophyll biosynthesis and growth in the *Synechocystis* sp. PCC 6803. *Tsinghua Sci. Technol.* 9:69-75.
- Hukmani, P. and Tripathy, B.C. (1994) Chlorophyll biosynthetic reactions during senescence of excised barley (*Hordeum vulgare* L. cv IB 65) leaves. *Plant Physiol.* 105: 1295-1300.
- Hunsperger, H.M., Randhawa, T. and Cattolico, R.A. 2015. Extensive horizontal gene transfer, duplication, and loss of chlorophyll synthesis genes in the algae. *BMC Evol. Biol.* 15:1-19. <https://doi.org/10.1186/s12862-015-0286-4>
- Hunter, G.A. and Ferreira, G.C. 2009. 5-Aminolevulinate synthase: catalysis of the first step of heme biosynthesis. *Cell Mol. Biol. (Noisy-le-Grand, France)* 55:102.
- Iwamoto, K., Fukuda, H. and Sugiyama, M. 2001. Elimination of POR expression correlates with red leaf formation in *Amaranthus tricolor*. *Plant J.* 27:275-284. <https://doi.org/10.1046/j.1365-313x.2001.01082.x>
- Janouškovec, J., Gavelis, G.S., Burki, F., Dinh, D., Bachvaroff, T.R., Gornik, S.G., Bright, K.J., Imanian, B., Strom, S.L., Delwiche, C.F. and Waller, R.F. 2017. Major transitions in dinoflagellate evolution unveiled by phylotranscriptomics. *Proc. Natl. Acad. Sci. U.S.A.* 114:E171-E180. <https://doi.org/10.1073/pnas.1614842114>
- Janouškovec, J., Horák, A., Oborník, M., Lukeš, J. and Keeling, P.J. 2010. A common red algal origin of the apicomplexan, dinoflagellate, and heterokont plastids. *Proc. Natl. Acad. Sci. U.S.A.* 107:10949-10954. <https://doi.org/10.1073/pnas.1003335107>
- Kasalický, V., Zeng, Y., Piwosz, K., Šimek, K., Kratochvilová, H. and Koblížek, M. 2018. Aerobic anoxygenic photosynthesis is commonly present within the genus *Limnohabitans*. *Appl. Environ. Microbiol.* 84:e02116-17. <https://doi.org/10.1128/aem.02116-17>

Kaschner, M., Loeschke, A., Krause, J., Minh, B.Q., Heck, A., Endres, S., Svensson, V., Wirtz, A., von Haeseler, A., Jaeger, K.E. and Drepper, T. 2014. Discovery of the first light-dependent protochlorophyllide oxidoreductase in anoxygenic phototrophic bacteria. *Mol. Microbiol.* 93:1066-1078. <https://doi.org/10.1111/mmi.12719>

Keeling, P.J. 2010. The endosymbiotic origin, diversification and fate of plastids. *Philos. Trans. R. Soc. B: Biol. Sci.* 365:729-748. <https://doi.org/10.1098/rstb.2009.0103>

Kees, E.D., Murugapiran, S.K., Bennett, A.C. and Hamilton, T.L. 2022. Distribution and genomic variation of thermophilic cyanobacteria in diverse microbial mats at the upper temperature limits of photosynthesis. *bioRxiv*. <https://doi.org/10.1128/msystems.00317-22>

Kehoe, D.M. 2010. Chromatic adaptation and the evolution of light color sensing in cyanobacteria. *Proc. Natl. Acad. Sci. U.S.A.* 107:9029-9030. <https://doi.org/10.1073/pnas.1004510107>

Kehoe, D.M. and Gutu, A. 2006. Responding to color: the regulation of complementary chromatic adaptation. *Annu. Rev. Plant Biol.* 57:127-150. <https://doi.org/10.1146/annurev.arplant.57.032905.105215>

Kerfeld, C.A. and Melnicki, M.R. 2016. Assembly, function and evolution of cyanobacterial carboxysomes. *Curr. Opin. Plant Biol.* 31:66-75. <https://doi.org/10.1016/j.pbi.2016.03.009>

Khan, H. and Archibald, J.M. 2008. Lateral transfer of introns in the cryptophyte plastid genome. *Nucleic acids Res.* 36:3043-3053. <https://doi.org/10.1093/nar/gkn095>

Kim, C. and Apel, K. 2012. Arabidopsis light-dependent NADPH: protochlorophyllide oxidoreductase A (PORA) is essential for normal plant growth and development: an addendum. *Plant Mol. Biol.* 80:237-240. <https://doi.org/10.1007/s11103-012-9944-8>

Kim, J.I., Moore, C.E., Archibald, J.M., Bhattacharya, D., Yi, G., Yoon, H.S. and Shin, W. 2017. Evolutionary dynamics of cryptophyte plastid genomes. *Genome Biol. Evol.* 9:1859-1872. <https://doi.org/10.1093/gbe/evx123>

Kim, S., and Park, M.G. 2016. *Paulinella longichromatophora* sp. nov., a new marine photosynthetic testate amoeba containing a chromatophore. *Protist.* 167:1-12. <https://doi.org/10.1016/j.protis.2015.11.003>

Kis-Petik, K., Böddi, B., Kaposi, A.D. and Fidy, J. 1999. Protochlorophyllide forms and energy transfer in dark-grown wheat leaves. *Studies by conventional and laser excited*

fluorescence spectroscopy between 10 K–100 K. *Photosyn. Res.* 60:87-98.  
<https://doi.org/10.1023/A:1006238921189>

Klement, H., Helfrich, M., Oster, U., Schoch, S. and Rüdiger, W. 1999. Pigment-free NADPH: protochlorophyllide oxidoreductase from *Avena sativa* L: Purification and substrate specificity. *Eur. J Biochem.* 265:862-874. <https://doi.org/10.1046/j.1432-1327.1999.00627.x>

Kobayashi, K. 2016. Role of membrane glycerolipids in photosynthesis, thylakoid biogenesis and chloroplast development. *J. plant res.* 129:565-580. <https://doi.org/10.1007/s10265-016-0827-y>

Kobayashi, M., Hamano, T., Akiyama, M., Watanabe, T., Inoue, K., Oh-oka, H., Amesz, J., Yamamura, M. and Kise, H. 1998. Light-independent isomerization of bacteriochlorophyll g to chlorophyll a catalyzed by weak acid in vitro. *Anal. Chim. Acta.* 365:199-203. [https://doi.org/10.1016/S0003-2670\(98\)00088-9](https://doi.org/10.1016/S0003-2670(98)00088-9)

Koonin, E.V. 2016. Horizontal gene transfer: essentiality and evolvability in prokaryotes, and roles in evolutionary transitions. *F1000Res.* 5. <https://doi.org/10.12688/f1000research.8737.1>

Kowalewska, Ł., Mazur, R., Suski, S., Garstka, M. and Mostowska, A. 2016. Three-dimensional visualization of the tubular-lamellar transformation of the internal plastid membrane network during runner bean chloroplast biogenesis. *Plant Cell.* 28:875-891. <https://doi.org/10.1105/tpc.15.01053>

Ku, C. and Martin, W.F. 2016. A natural barrier to lateral gene transfer from prokaryotes to eukaryotes revealed from genomes: the 70% rule. *BMC Biol* 14:1-12. <https://doi.org/10.1186/s12915-016-0315-9>

Kumar, S., Stecher, G. and Tamura, K. 2016. MEGA7: molecular evolutionary genetics analysis version 7.0 for bigger datasets. *Mol. Biol. Evol.* 33:1870-1874. <https://doi.org/10.1093/molbev/msw054>

Kusumi, J., Sato, A. and Tachida, H. 2006. Relaxation of functional constraint on light-independent protochlorophyllide oxidoreductase in *Thuja*. *Molecular Biol. Evol.* 23:941-948. <https://doi.org/10.1093/molbev/msj097>

Kwon, C.T., Kim, S.H., Song, G., Kim, D. and Paek, N.C. 2017. Two NADPH: protochlorophyllide oxidoreductase (POR) isoforms play distinct roles in environmental adaptation in rice. *Rice*. 10:1-14. <https://doi.org/10.1186/s12284-016-0141-2>

Lauritano, C., De Luca, D., Ferrarini, A., Avanzato, C., Minio, A., Esposito, F. and Ianora, A. 2017. De novo transcriptome of the cosmopolitan dinoflagellate *Amphidinium carterae* to identify enzymes with biotechnological potential. *Sci. rep.* 7:1-12. <https://doi.org/10.1038/s41598-017-12092-1>

Lebedev, N. and Timko, M.P. 1999. Protochlorophyllide oxidoreductase B-catalyzed protochlorophyllide photoreduction in vitro: insight into the mechanism of chlorophyll formation in light-adapted plants. *Proc. Natl. Acad. Sci. U.S.A.* 96:9954-9959. <https://doi.org/10.1073/pnas.96.17.9954>

Lebedev, N., Karginova, O., McIvor, W. and Timko, M.P. 2001. Tyr275 and Lys279 stabilize NADPH within the catalytic site of NADPH: protochlorophyllide oxidoreductase and are involved in the formation of the enzyme photoactive state. *Biochemistry*. 40:12562-12574. <https://doi.org/10.1021/bi0105025>

Letunic, I. and Bork, P. 2016. Interactive tree of life (iTOL) v3: an online tool for the display and annotation of phylogenetic and other trees. *Nucleic acids Res.* 44:W242-W245. <https://doi.org/10.1093/nar/gkw290>

Lhee, D., Bhattacharya, D. and Yoon, H.S. 2021. Independent evolution of the thioredoxin system in photosynthetic *Paulinella* species. *Curr. Biol.* 31:R328-R329. <https://doi.org/10.1016/j.cub.2021.02.029>

Li, J. and Timko, M.P. 1996. The pc-1 phenotype of *Chlamydomonas reinhardtii* results from a deletion mutation in the nuclear gene for NADPH: protochlorophyllide oxidoreductase. *Plant Mol. Biol.* 15-37. <https://doi.org/10.1007/BF00017800>

Marin, B., Nowack, E., Glöckner, G. and Melkonian, M. 2007. The ancestor of the *Paulinella* chromatophore obtained a carboxysomal operon by horizontal gene transfer from a *Nitrococcus*-like  $\gamma$ -proteobacterium. *BMC Evol. Biol.* 7:1-14. <https://doi.org/10.1186/1471-2148-7-85>

Masuda, S., Ikeda, R., Masuda, T., Hashimoto, H., Tsuchiya, T., Kojima, H., Nomata, J., Fujita, Y., Mimuro, M., Ohta, H. and Takamiya, K.I. 2009. Prolamellar bodies formed by

cyanobacterial protochlorophyllide oxidoreductase in Arabidopsis. *The Plant J.* 58:952-960. <https://doi.org/10.1111/j.1365-313X.2009.03833.x>

Masuda, T. and Takamiya, K.I. 2004. Novel insights into the enzymology, regulation and physiological functions of light-dependent protochlorophyllide oxidoreductase in angiosperms. *Photosyn. Res.* 81:1-29. <https://doi.org/10.1023/B:PRES.0000028392.80354.7c>

Masuda, T., Fusada, N., Oosawa, N., Takamatsu, K.I., Yamamoto, Y.Y., Ohto, M., Nakamura, K., Goto, K., Shibata, D., Shirano, Y. and Hayashi, H. 2003. Functional analysis of isoforms of NADPH: protochlorophyllide oxidoreductase (POR), PORB and PORC, in *Arabidopsis thaliana*. *Plant Cell Physiol.* 44:963-974. <https://doi.org/10.1093/pcp/pcg128>

Masuda, T., Fusada, N., Shiraishi, T., Kuroda, H., Awai, K., Shimada, H., Ohta, H. and Takamiya, K.I. 2002. Identification of two differentially regulated isoforms of protochlorophyllide oxidoreductase (POR) from tobacco revealed a wide variety of light-and development-dependent regulations of POR gene expression among angiosperms. *Photosyn. Res.* 74:165-172. <https://doi.org/10.1023/A:1020951409135>

McFarlane, M.J., Hunter, C.N. and Heyes, D.J. 2005. Kinetic characterisation of the light-driven protochlorophyllide oxidoreductase (POR) from *Thermosynechococcus elongatus*. *Photochem. Photobiol. Sci.* 4:1055-1059. <https://doi.org/10.1039/b506035d>

Menon, B.R., Waltho, J.P., Scrutton, N.S. and Heyes, D.J. 2009. Cryogenic and laser photoexcitation studies identify multiple roles for active site residues in the light-driven enzyme protochlorophyllide oxidoreductase. *J. Biol. Chem.* 284:18160-18166. <https://doi.org/10.1074/jbc.M109.020719>

Min, B., Park, J.H., Park, H., Shin, H.D. and Choi, I.G. 2017. Genome analysis of a zygomycete fungus *Choanephora cucurbitarum* elucidates necrotrophic features including bacterial genes related to plant colonization. *Sci. Rep.* 7:1-11. <https://doi.org/10.1038/srep40432>

Minge, M.A., Shalchian-Tabrizi, K., Tørresen, O.K., Takishita, K., Probert, I., Inagaki, Y., Klaveness, D. and Jakobsen, K.S. 2010. A phylogenetic mosaic plastid proteome and unusual plastid-targeting signals in the green-colored dinoflagellate *Lepidodinium chlorophorum*. *BMC Evol. Biol.* 10:1-11. <https://doi.org/10.1186/1471-2148-10-191>

- Mohanty, S., Grimm, B. and Tripathy, B.C. 2006. Light and dark modulation of chlorophyll biosynthetic genes in response to temperature. *Planta*. 224:692-699. <https://doi.org/10.1007/s00425-006-0248-6>
- Moummou, H., Kallberg, Y., Tonfack, L.B., Persson, B. and Van der Rest, B. 2012. The plant short-chain dehydrogenase (SDR) superfamily: genome-wide inventory and diversification patterns. *BMC Plant Biol.* 12:1-17. <https://doi.org/10.1186/1471-2229-12-219>
- Mullet, J.E. 1988. Chloroplast development and gene expression. *Ann. Rev. Plant Physiol. Plant Mol. Biol.* 39:475-502. <https://doi.org/10.1146/annurev.pp.39.060188.002355>
- Nascimento, S.M., Zou, Y. and Cheng, Q. 2016. Review of studies on the last enzymes in bacteriochlorophyll (Bchl) and chlorophyll (Chl) biosynthesis. *Am. J. Plant Sci.* 7:1639-1651. <http://dx.doi.org/10.4236/ajps.2016.712155>
- Nomata, J., Kitashima, M., Inoue, K. and Fujita, Y. 2006. Nitrogenase Fe protein-like Fe-S cluster is conserved in L-protein (BehL) of dark-operative protochlorophyllide reductase from *Rhodobacter capsulatus*. *FEBS Lett.* 580:6151-6154. <https://doi.org/10.1016/j.febslet.2006.10.014>
- Nomata, J., Terauchi, K. and Fujita, Y. 2016. Stoichiometry of ATP hydrolysis and chlorophyllide formation of dark-operative protochlorophyllide oxidoreductase from *Rhodobacter capsulatus*. *Biochem. Biophys. Res. Commun.* 470:704-709. <https://doi.org/10.1016/j.bbrc.2016.01.070>
- Nowack, E.C. 2014. *Paulinella chromatophora*-rethinking the transition from endosymbiont to organelle. *Acta Soc. Bot. Pol.* 83:4.
- Nowack, E.C. and Grossman, A.R. 2012. Trafficking of protein into the recently established photosynthetic organelles of *Paulinella chromatophora*. *Proc. Natl. Acad. Sci. U.S.A.* 109:5340-5345. <https://doi.org/10.1073/pnas.1118800109>
- Oliver, R.P. and Griffiths, W.T. 1982. Pigment-protein complexes of illuminated etiolated leaves. *Plant Physiol.* 70:1019-1025. <https://doi.org/10.1104/pp.70.4.1019>
- Olson, J.M. 2001. 'Evolution of Photosynthesis'(1970), re-examined thirty years later. *Photosyn. Res.* 68:95-112. <https://doi.org/10.1023/A:1011807229154>
- Oosawa, N., Masuda, T., Awai, K., Fusada, N., Shimada, H., Ohta, H. and Takamiya, K.I. 2000. Identification and light-induced expression of a novel gene of

NADPH-protochlorophyllide oxidoreductase isoform in *Arabidopsis thaliana*. *FEBS Lett.* 474:133-136. [https://doi.org/10.1016/S0014-5793\(00\)01568-4](https://doi.org/10.1016/S0014-5793(00)01568-4)

Oppermann, U., Filling, C., Hult, M., Shafqat, N., Wu, X., Lindh, M., Shafqat, J., Nordling, E., Kallberg, Y., Persson, B. and Jörnvall, H. 2003. Short-chain dehydrogenases/reductases (SDR): the 2002 update. *Chem. Biol. Interact.* 143:247-253. [https://doi.org/10.1016/S0009-2797\(02\)00164-3](https://doi.org/10.1016/S0009-2797(02)00164-3)

Paddock, T., Lima, D., Mason, M.E., Apel, K. and Armstrong, G.A. 2012. *Arabidopsis* light-dependent protochlorophyllide oxidoreductase A (PORA) is essential for normal plant growth and development. *Plant Mol. Biol.* 78:447-460. <https://doi.org/10.1007/s11103-012-9873-6>

Paddock, T.N., Mason, M.E., Lima, D.F. and Armstrong, G.A. 2010. *Arabidopsis* protochlorophyllide oxidoreductase A (PORA) restores bulk chlorophyll synthesis and normal development to a *porB porC* double mutant. *Plant Mol. Biol.* 72:445-457. <https://link.springer.com/article/10.1007/s11103-009-9582-y#citeas>

Pattanaik, B., Whitaker, M.J. and Montgomery, B.L. 2011. Convergence and divergence of the photoregulation of pigmentation and cellular morphology in *Fremyella diplosiphon*. *Plant Signal. Behav.* 6:2038-2041. <https://doi.org/10.4161/psb.6.12.18239>

Pattanayak, G.K. and Tripathy, B.C. 2002. Catalytic function of a novel protein protochlorophyllide oxidoreductase C of *Arabidopsis thaliana*. *Biochem. Biophys. Res. Commun.* 291:921-924. <https://doi.org/10.1006/bbrc.2002.6543>

Pattanayak, G.K. and Tripathy, B.C. 2011. Overexpression of protochlorophyllide oxidoreductase C regulates oxidative stress in *Arabidopsis*. *PLoS One.* 6:p.e26532. <https://doi.org/10.1371/journal.pone.0026532>

Persson, B., Kallberg, Y., Oppermann, U. and Jörnvall, H. 2003. Coenzyme-based functional assignments of short-chain dehydrogenases/reductases (SDRs). *Chem. Biol. Interact.* 143:271-278. [https://doi.org/10.1016/S0009-2797\(02\)00223-5](https://doi.org/10.1016/S0009-2797(02)00223-5)

Petersen, J., Ludewig, A.K., Michael, V., Bunk, B., Jarek, M., Baurain, D. and Brinkmann, H. 2014. *Chromera velia*, endosymbioses and the rhodoplex hypothesis—plastid evolution in cryptophytes, alveolates, stramenopiles, and haptophytes (CASH lineages). *Genome Biol. Evol.* 6:666-684. <https://doi.org/10.1093/gbe/evu043>



Przybyla-Toscano, J., Couturier, J., Remacle, C. and Rouhier, N. 2021. Occurrence, evolution and specificities of iron-sulfur proteins and maturation factors in chloroplasts from algae. *Int. J. Mol. Sci.* 22:3175. <https://doi.org/10.3390/ijms22063175>

Qiu, H., Cai, G., Luo, J., Bhattacharya, D. and Zhang, N. 2016. Extensive horizontal gene transfers between plant pathogenic fungi. *BMC Biol.* 14:1-11. <https://doi.org/10.1186/s12915-016-0264-3>

Rabinowitch, E.I. 1965. The role of chlorophyll in photosynthesis. *Sci. Am.* 213:74-83.

Rabinowitch, E.I., and Govindjee. 1969. *Photosynthesis*. New York, John Wiley & Sons Inc:1-273.

Rebeiz, C.A., Benning, C., Bohnert, H.J., Daniell, H., Hooper, J.K., Lichtenthaler, H.K., Portis, A.R. and Tripathy, B.C. editors. 2010. *The chloroplast: basics and applications*. Vol. 31. Springer Science & Business Media.

Reinbothe, C., El Bakkouri, M., Buhr, F., Muraki, N., Nomata, J., Kurisu, G., Fujita, Y. and Reinbothe, S. 2010. Chlorophyll biosynthesis: spotlight on protochlorophyllide reduction. *Trends Plant Sci.* 15:614-624. <https://doi.org/10.1016/j.tplants.2010.07.002>

Reinbothe, C., Lepinat, A., Deckers, M., Beck, E. and Reinbothe, S. 2003. The extra loop distinguishing POR from the structurally related short-chain alcohol dehydrogenases is dispensable for pigment binding but needed for the assembly of light-harvesting POR-protochlorophyllide complex. *J. Biol. Chem.* 278:816-822. <https://doi.org/10.1074/jbc.M209739200>

Reinbothe, S. and Reinbothe, C. 1996. The regulation of enzymes involved in chlorophyll biosynthesis. *Eur. J. Biochem.* 237:323-343. <https://doi.org/10.1111/j.1432-1033.1996.00323.x>

Reinbothe, S., Reinbothe, C., Lebedev, N. and Apel, K. 1996. PORA and PORB, two light-dependent protochlorophyllide-reducing enzymes of angiosperm chlorophyll biosynthesis. *Plant Cell.* 8:763. <https://doi.org/10.1105/2Ftpc.8.5.763>

Richards, T.A., Soanes, D.M., Foster, P.G., Leonard, G., Thornton, C.R. and Talbot, N.J. 2009. Phylogenomic analysis demonstrates a pattern of rare and ancient horizontal gene transfer between plants and fungi. *Plant Cell.* 21:1897-1911. <https://doi.org/10.1105/tpc.109.065805>

Rogers, M.B., Gilson, P.R., Su, V., McFadden, G.I. and Keeling, P.J. 2007. The complete chloroplast genome of the chlorarachniophyte *Bigeloviella natans*: evidence for independent origins of chlorarachniophyte and euglenid secondary endosymbionts. *Mol. Biol. Evol.* 24:54-62. <https://doi.org/10.1093/molbev/msl129>

Rowe, J.D. and Griffiths, W.T. 1995. Protochlorophyllide reductase in photosynthetic prokaryotes and its role in chlorophyll synthesis. *Biochem. J.* 311:417-424. <https://doi.org/10.1042/bj3110417>

Runge, S., Sperling, U., Frick, G., Apel, K. and Armstrong, G.A. 1996. Distinct roles for light-dependent NADPH: protochlorophyllide oxidoreductases (POR) A and B during greening in higher plants. *Plant J.* 9: 513-523. <https://doi.org/10.1046/j.1365-313X.1996.09040513.x>

Ryberg, M. and Sundqvist, C. 1982. Characterization of prolamellar bodies and prothylakoids fractionated from wheat etioplasts. *Physiol. Plant.* 56:125-132. <https://doi.org/10.1111/j.1399-3054.1982.tb00313.x>

Sakuraba, Y., Rahman, M.L., Cho, S.H., Kim, Y.S., Koh, H.J., Yoo, S.C. and Paek, N.C. 2013. The rice faded green leaf locus encodes protochlorophyllide oxidoreductase B and is essential for chlorophyll synthesis under high light conditions. *Plant J.*74:122-133. <https://doi.org/10.1111/tbj.12110>

Sameer, H., Victor, G., Katalin, S. and Henrik, A. 2021. Elucidation of ligand binding and dimerization of NADPH: protochlorophyllide (Pchl) oxidoreductase from pea (*Pisum sativum* L.) by structural analysis and simulations. *Proteins: Struct. Funct. Bioinfo.* 89:1300-1314. <https://doi.org/10.1002/prot.26151>

Saphier, S., Piran, R. and Keinan, E. 2005. Photoenzymes and photoabzymes. Keinan E , editor. *Catalytic antibodies*. John Wiley & Sons. 350-369.

Savino, S., Desmet, T. and Franceus, J. 2022. Insertions and deletions in protein evolution and engineering. *Biotechnol. Adv.* 108010. <https://doi.org/10.1016/j.biotechadv.2022.108010>

Scheer, H. 2006. An overview of chlorophylls and bacteriochlorophylls: biochemistry, biophysics, functions and applications. In: Grimm, B., Porra, R.J., Rüdiger, W., Scheer, H, editors. *Chlorophylls and Bacteriochlorophylls. Advances in Photosynthesis and Respiration*, vol 25. Springer, Dordrecht.p.1-26. [https://doi.org/10.1007/1-4020-4516-6\\_1](https://doi.org/10.1007/1-4020-4516-6_1)

Schirromeister, B.E., de Vos, J.M., Antonelli, A. and Bagheri, H.C. 2013. Evolution of multicellularity coincided with increased diversification of cyanobacteria and the Great Oxidation Event. *Proc. Natl. Acad. Sci. U.S.A.* 110:1791-1796. <https://doi.org/10.1073/pnas.1209927110>

Schoefs, B. 2000. The light-dependent and light-independent reduction of protochlorophyllide a to chlorophyllide a. *Photosynthetica* 36:481-496. <https://doi.org/10.1023/A:1007002101856>

Schoefs, B. and Franck, F. 2003. Protochlorophyllide Reduction: Mechanisms and Evolution¶. *Photochem Photobiol* 78:543-557. [https://doi.org/10.1562/0031-8655\(2003\)0780543PRMAE2.0.CO2](https://doi.org/10.1562/0031-8655(2003)0780543PRMAE2.0.CO2)

Schoefs, B., Bertrand, M. and Funk, C. 2000. Photoactive Protochlorophyllide Regeneration in Cotyledons and Leaves from Higher Plants†¶. *Photochem Photobiol* 72:660-668. [https://doi.org/10.1562/0031-8655\(2000\)0720660PPRICA2.0.CO2](https://doi.org/10.1562/0031-8655(2000)0720660PPRICA2.0.CO2)

Schulz, R., Steinmüller, K., Klaas, M., Forreiter, C., Rasmussen, S., Hiller, C. and Apel, K. 1989. Nucleotide sequence of a cDNA coding for the NADPH-protochlorophyllide oxidoreductase (PCR) of barley (*Hordeum vulgare* L.) and its expression in *Escherichia coli*. *Mol. Gen. Genet. MGG.* 217:355-361. <https://doi.org/10.1007/BF02464904>

Shih, P.M. and Matzke, N.J. 2013. Primary endosymbiosis events date to the later Proterozoic with cross-calibrated phylogenetic dating of duplicated ATPase proteins. *Proc. Natl. Acad. Sci. U.S.A.* 110:12355-12360. <https://doi.org/10.1073/pnas.1305813110>

Shui, J., Saunders, E., Needleman, R., Nappi, M., Cooper, J., Hall, L., Kehoe, D. and Stowe-Evans, E. 2009. Light-dependent and light-independent protochlorophyllide oxidoreductases in the chromatically adapting cyanobacterium *Fremyella diplosiphon* UTEX 481. *Plant cell Physiol.* 50:1507-1521. <https://doi.org/10.1093/pcp/pcp095>

Silva, P.J. 2014. With or without light: comparing the reaction mechanism of dark-operative protochlorophyllide oxidoreductase with the energetic requirements of the light-dependent protochlorophyllide oxidoreductase. *PeerJ.* 2: p.e551. <https://doi.org/10.7717/peerj.551>

Skinner, J.S. and Timko, M.P. 1998. Loblolly pine (*Pinus taeda* L.) contains multiple expressed genes encoding light-dependent NADPH: protochlorophyllide oxidoreductase (POR). *Plant cell Physiol.* 39:795-806. <https://doi.org/10.1093/oxfordjournals.pcp.a029437>

Skinner, J.S. and Timko, M.P. 1999. Differential expression of genes encoding the light-dependent and light-independent enzymes for protochlorophyllide reduction during development in loblolly pine. *Plant Mol. Biol.* 39:577-592. <https://doi.org/10.1023/A:1006144630071>

Smith, D.R., Cvetkovska, M., Hüner, N.P. and Morgan-Kiss, R. 2019. Presence and absence of light-independent chlorophyll biosynthesis among *Chlamydomonas* green algae in an ice-covered Antarctic lake. *Commun. Integr. Biol.* 12:148-150. <https://doi.org/10.1080/19420889.2019.1676611>

Soffe, M.S. 2016. ATP Usage in the Dark-Operative Protochlorophyllide Oxidoreductase. Utah State University.

Solymosi, K. and Schoefs, B. 2008. Prolamellar body: a unique plastid compartment, which does not only occur in dark-grown leaves. *Plant cell organ.—selected topics. Research Signpost, Trivandrum*:151-202.

Solymosi, K. and Schoefs, B. 2010. Etioplast and etio-chloroplast formation under natural conditions: the dark side of chlorophyll biosynthesis in angiosperms. *Photosynth. Res.* 105:143-166. <https://doi.org/10.1007/s11120-010-9568-2>

Sorigué, D., Légeret, B., Cuiné, S., Blangy, S., Moulin, S., Billon, E., Richaud, P., Brugière, S., Couté, Y., Nurizzo, D. and Müller, P. 2017. An algal photoenzyme converts fatty acids to hydrocarbons. *Science.* 357:903-907. <https://doi.org/10.1126/science.aan6349>

Sousa, F.L., Shavit-Grievink, L., Allen, J.F. and Martin, W.F. 2013. Chlorophyll biosynthesis gene evolution indicates photosystem gene duplication, not photosystem merger, at the origin of oxygenic photosynthesis. *Genome Biol. Evol.* 5:200-216. <https://doi.org/10.1093/gbe/evs127>

Spano, A.J., He, Z., Michel, H., Hunt, D.F. and Timko, M.P. 1992. Molecular cloning, nuclear gene structure, and developmental expression of NADPH: protochlorophyllide oxidoreductase in pea (*Pisum sativum* L.). *Plant Mol. Biol.* 18:972. <https://doi.org/10.1007/BF00019210>

Stowe, W.C., Brodie-Kommit, J. and Stowe-Evans, E. 2011. Characterization of complementary chromatic adaptation in *Gloeotrichia* UTEX 583 and identification of a

transposon-like insertion in the *cpeBA* operon. *Plant Cell Physiol.* 52:553-562.  
<https://doi.org/10.1093/pcp/pcr014>

Su, Q., Frick, G., Armstrong, G. and Apel, K. 2001. POR C of *Arabidopsis thaliana*: a third light-and NADPH-dependent protochlorophyllide oxidoreductase that is differentially regulated by light. *Plant Mol. Biol.* 47:805-813. <https://doi.org/10.1023/A:1013699721301>

Sundqvist, C. and Dahlin, C. 1997. With chlorophyll pigments from prolamellar bodies to light-harvesting complexes. *Physiol. Plant.* 100:748-759. <https://doi.org/10.1111/j.1399-3054.1997.tb00002.x>

Suzuki, J.Y. and Bauer, C.E. 1992. Light-independent chlorophyll biosynthesis: involvement of the chloroplast gene *chlL* (*frxC*). *Plant Cell* 4:929-940. <https://doi.org/10.1105/tpc.4.8.929>

Suzuki, J.Y. and Bauer, C.E. 1995. A prokaryotic origin for light-dependent chlorophyll biosynthesis of plants. *Proc. Natl. Acad. Sci. U.S.A.* 92:3749-3753. <https://doi.org/10.1073/pnas.92.9.3749>

Sytina, O.A., Heyes, D.J., Hunter, C.N., Alexandre, M.T., Van Stokkum, I.H., Van Grondelle, R. and Groot, M.L. 2008. Conformational changes in an ultrafast light-driven enzyme determine catalytic activity. *Nature.* 456:1001-1004. <https://doi.org/10.1038/nature07354>

Takio, S., Nakao, N., Suzuki, T., Tanaka, K., Yamamoto, I. and Satoh, T., 1998. Light-dependent expression of protochlorophyllide oxidoreductase gene in the liverwort, *Marchantia paleacea* var. *diptera*. *Plant cell physiol.* 39:665-669. <https://doi.org/10.1093/oxfordjournals.pcp.a029420>

Tanaka, A., and Tanaka, R. 2006. Chlorophyll metabolism. *Curr. Opin. Plant Biol.* 9:248-255. <https://doi.org/10.1016/j.pbi.2006.03.011>

Tanaka, R. and Tanaka, A. 2007. Tetrapyrrole biosynthesis in higher plants. *Annu. Rev. Plant Biol.* 58:321-346. <https://doi.org/10.1146/annurev.arplant.57.032905.105448>

Teakle, G.R. and Griffiths, W.T. 1993. Cloning, characterization and import studies on protochlorophyllide reductase from wheat (*Triticum aestivum*). *Biochem. J.* 296:225-230. <https://doi.org/10.1042/bj2960225>

Tewari, A.K. and Tripathy, B.C. 1998. Temperature-stress-induced impairment of chlorophyll biosynthetic reactions in cucumber and wheat. *Plant Physiol.* 117:851-858. <https://doi.org/10.1104/pp.117.3.851>

Tewari, A.K. and Tripathy, B.C. 1999. Acclimation of chlorophyll biosynthetic reactions to temperature stress in cucumber (*Cucumis sativus* L.). *Planta.* 208:431-437. <https://doi.org/10.1007/s004250050579>

Tomitani, A., Okada, K., Miyashita, H., Matthijs, H.C., Ohno, T. and Tanaka, A. 1999. Chlorophyll b and phycobilins in the common ancestor of cyanobacteria and chloroplasts. *Nature.* 400:159-162. <https://doi.org/10.1038/22101>

Treangen, T.J. and Rocha, E.P. 2011. Horizontal transfer, not duplication, drives the expansion of protein families in prokaryotes. *PLoS Genet.* 7:p.e1001284. <https://doi.org/10.1371/journal.pgen.1001284>

Tripathy, B.C. and Dalal, V. 2013. Modulation of chlorophyll biosynthesis by environmental cues. In: Biswal, B., Krupinska, K., Biswal, U. editors *Plastid Development in Leaves during Growth and Senescence. Advances in Photosynthesis and Respiration.* vol 36. Springer, Dordrecht. p.601-639. [https://doi.org/10.1007/978-94-007-5724-0\\_27](https://doi.org/10.1007/978-94-007-5724-0_27)

Tripathy, B.C. and Pattanayak, G.K. 2010. Singlet oxygen-induced oxidative stress in plants. In: Constantin A. Rebeiz, Christoph Benning, Hans J. Bohnert, Henry Daniell, J. Kenneth Hooper, Hartmut K. Lichtenthaler, Archie R. Portis, Baishnab C. Tripathy. *The Chloroplast. Advances in Photosynthesis and Respiration.* vol 31. Springer, Dordrecht. p. 397-412. [https://doi.org/10.1007/978-90-481-8531-3\\_25](https://doi.org/10.1007/978-90-481-8531-3_25)

Tripathy, B.C. and Pattanayak, G.K. 2012. Chlorophyll biosynthesis in higher plants. In Eaton-Rye, J., Tripathy, B., Sharkey, T. *Photosynthesis. Advances in Photosynthesis and Respiration.* vol 34. Springer, Dordrecht. p. 63-94. [https://doi.org/10.1007/978-94-007-1579-0\\_3](https://doi.org/10.1007/978-94-007-1579-0_3)

Tripathy, B.C. and Rebeiz, C.A. 1986. Chloroplast biogenesis. Demonstration of the monovinyl and divinyl monocarboxylic routes of chlorophyll biosynthesis in higher plants. *J. Biol. Chem.* 261:13556-13564. [https://doi.org/10.1016/S0021-9258\(18\)67055-3](https://doi.org/10.1016/S0021-9258(18)67055-3)

Tripathy, B.C. and Rebeiz, C.A. 1988. Chloroplast biogenesis 60: conversion of divinyl protochlorophyllide to monovinyl protochlorophyllide in green (ing) barley, a dark

monovinyl/light divinyl plant species. *Plant Physiol.* 87:89-94.  
<https://doi.org/10.1104/pp.87.1.89>

Tunjić, M. and Korač, P. 2013. Vertical and horizontal gene transfer in lichens. *Period. Biol.* 115:321-329.

Vedalankar, P. and Tripathy, B.C. 2019. Evolution of light-independent protochlorophyllide oxidoreductase. *Protoplasma.* 256:293-312. <https://doi.org/10.1007/s00709-018-1317-y>

Wagner-Döbler, I., Ballhausen, B., Berger, M., Brinkhoff, T., Buchholz, I., Bunk, B., Cypionka, H., Daniel, R., Drepper, T., Gerdts, G. and Hahnke, S. 2010. The complete genome sequence of the algal symbiont *Dinoroseobacter shibae*: a hitchhiker's guide to life in the sea. *ISME J.* 4:61-77. <https://doi.org/10.1038/ismej.2009.94>

Walmsley, J., Adamson, H., Wright, M. and Wrench, P. 1999. Can *Psilotum* and/or *Gnetum* synthesise chlorophyll in darkness?. In Argyroudi-Akoyunoglou, J.H., Senger, H. *The Chloroplast: From Molecular Biology to Biotechnology.* NATO Science Series. vol 64. Springer, Dordrecht. p 201-205. [https://doi.org/10.1007/978-94-011-4788-0\\_32](https://doi.org/10.1007/978-94-011-4788-0_32)

Wang, Y., Zhang, R., Zheng, Q. and Jiao, N. 2014. Draft genome sequences of two marine phototrophic bacteria, *Erythrobacter longus* strain DSM 6997 and *Erythrobacter litoralis* strain DSM 8509. *Genome Announc.* 2:e00677-14. <https://doi.org/10.1128/genomeA.00677-14>

Whelan, S. and Goldman, N. 2001. A general empirical model of protein evolution derived from multiple protein families using a maximum-likelihood approach. *Mol. Biol. Evol.* 18:691-699. <https://doi.org/10.1093/oxfordjournals.molbev.a003851>

Whelan, S. and Goldman, N. 2001. A general empirical model of protein evolution derived from multiple protein families using a maximum-likelihood approach. *Mol. Biol. Evol.* 18:691-699. <https://doi.org/10.1093/oxfordjournals.molbev.a003851>

Wiktorsson, B. 1993. The effect of cross-linking of the subunits of NADPH-protochlorophyllide oxidoreductase on the aggregational state of protochlorophyllide. *Photosynthetica.* 29:205-218.

Wilks, H.M. and Timko, M.P. 1995. A light-dependent complementation system for analysis of NADPH: protochlorophyllide oxidoreductase: identification and mutagenesis of two

conserved residues that are essential for enzyme activity. *Proc. Natl. Acad. Sci. U.S.A.* 92:724-728. <https://doi.org/10.1073/pnas.92.3.724>

Wisecaver, J.H., Brosnahan, M.L. and Hackett, J.D. 2013. Horizontal gene transfer is a significant driver of gene innovation in dinoflagellates. *Genome Biol. Evol.* 5:2368-2381. <https://doi.org/10.1093/gbe/evt179>

Yamamoto, H., Kojima-Ando, H., Ohki, K. and Fujita, Y. 2020. Formation of prolamellar-body-like ultrastructures in etiolated cyanobacterial cells overexpressing light-dependent protochlorophyllide oxidoreductase in *Leptolyngbya boryana*. *J. Gen. Appl. Microbiol.* 66:129-139. <https://doi.org/10.2323/jgam.2020.01.009>

Yamamoto, H., Kurumiya, S., Ohashi, R. and Fujita, Y. 2009. Oxygen sensitivity of a nitrogenase-like protochlorophyllide reductase from the cyanobacterium *Leptolyngbya boryana*. *Plant cell Physiol.* 50:1663-1673. <https://doi.org/10.1093/pcp/pcp111>

Yamamoto, H., Kusumi, J., Yamakawa, H. and Fujita, Y. 2017. The effect of two amino acid residue substitutions via RNA editing on dark-operative protochlorophyllide oxidoreductase in the black pine chloroplasts. *Sci. Rep.* 7:1-10. <https://doi.org/10.1038/s41598-017-02630-2>

Yamazaki, S., Nomata, J. and Fujita, Y. 2006. Differential operation of dual protochlorophyllide reductases for chlorophyll biosynthesis in response to environmental oxygen levels in the cyanobacterium *Leptolyngbya boryana*. *Plant Physiol.* 142:911-922. <https://doi.org/10.1104/pp.106.086090>

Yang, J. and Cheng, Q. 2004. Origin and evolution of the light-dependent protochlorophyllide oxidoreductase (LPOR) genes. *Plant Biol.* 6:537-544. <https://doi.org/10.1055/s-2004-821270>

Yoshida, K., Chen, R.M., Tanaka, A., Teramoto, H., Tanaka, R., Timko, M.P. and Tsuji, H. 1995. Correlated changes in the activity, amount of protein, and abundance of transcript of NADPH: protochlorophyllide oxidoreductase and chlorophyll accumulation during greening of cucumber cotyledons. *Plant Physiol.* 109:231-238. <https://doi.org/10.1104/pp.109.1.231>

Yurkov, V. and Hughes, E. 2017. Aerobic anoxygenic phototrophs: four decades of mystery. In Hallenbeck, P. editor. *Modern Topics in the Phototrophic Prokaryotes*. Springer, Cham. 193-214. [https://doi.org/10.1007/978-3-319-46261-5\\_6](https://doi.org/10.1007/978-3-319-46261-5_6)



Zeng, Y., Selyanin, V., Lukeš, M., Dean, J., Kaftan, D., Feng, F. and Koblížek, M. 2015. Characterization of the microaerophilic, bacteriochlorophyll a-containing bacterium *Gemmatimonas phototrophica* sp. nov., and emended descriptions of the genus *Gemmatimonas* and *Gemmatimonas aurantiaca*. *Int. J. Syst. Evol. Microbiol.* 65:2410-2419. <https://doi.org/10.1099/ijs.0.000272>

Zhang, S., Godwin, A.R., Taylor, A., Hardman, S.J., Jowitt, T.A., Johannissen, L.O., Hay, S., Baldock, C., Heyes, D.J. and Scrutton, N.S. 2021. Dual role of the active site ‘lid’ regions of protochlorophyllide oxidoreductase in photocatalysis and plant development. *FEBS J.* 288:175-189. <https://doi.org/10.1111/febs.15542>

Zhang, S., Heyes, D.J., Feng, L., Sun, W., Johannissen, L.O., Liu, H., Levy, C.W., Li, X., Yang, J., Yu, X. and Lin, M. 2019. Structural basis for enzymatic photocatalysis in chlorophyll biosynthesis. *Nature.* 574:722-725. <https://doi.org/10.1038/s41586-019-1685-2>

## Figure legends

**Figure 1.** The schematic representation of the enzymatic steps involved in chlorophyll biosynthesis pathway starting from Glutamic acid

**Figure 2.** Proposed proton-relay path from Dong et al. 2020. (A) The hydrogen bond network bridging the Tyr193  $\eta$ O and a solvent water molecule within the SyLPOR and TeLPOR structures. The well-positioned water, shown in the red sphere, is fixed by the backbone oxygens of Ala91 and Asn115, and the  $\epsilon$ -amino group of Lys197. The hydrogen bonds are shown in dashed lines and the bond lengths ( $\text{\AA}$ ) are in blue for SyLPOR and dark green for TeLPOR. (B) A proposed proton-relay path following the hydride transfer from NADPH to C17. The photon energy ( $h\nu$ ) is represented by a yellow thunderbolt (Dong et al. 2020).

**Figure 3.** The crystal structure of SyLPOR and TeLPOR from Dong et al. 2020. Ribbon representation of the overall structures of SyLPOR and TeLPOR. (A) Two side views of SyLPOR. The secondary structure elements are colored in blue except the antiparallel  $\beta 8$  in yellow. The loop region is in gray. The LPOR-specific insertion is colored in black. The NADPH-binding sequence is colored in green. Four cysteine residues are shown in sphere mode. The cofactor NADPH is shown in stick-and-ball mode. (B) Front view of SyLPOR (Left), TeLPOR (Right), and their superimposition (Middle). The secondary structure elements of TeLPOR are colored in deep green except  $\beta 8$  in magenta; the NADPH-binding sequence is colored in cyan. The  $\alpha$ -helices are labeled alphabetically, and the  $\beta$ -strands are labeled numerically (Dong et al., 2020).

**Figure 4.** Molecular Phylogenetic analysis by Maximum Likelihood method

The evolutionary history was inferred by using the Maximum Likelihood method based on the Whelan and Goldman + Freq. model (Whelan and Goldman, 2001). The bootstrap consensus tree inferred from 500 replicates (Felsenstein,1985) is taken to represent the evolutionary history of the taxa analyzed (Felsenstein,1985). Branches corresponding to partitions reproduced in less than 50% bootstrap replicates are collapsed. The percentage of replicate trees in which the associated taxa clustered together in the bootstrap test (500 replicates) are shown next to the branches (Felsenstein,1985). Initial tree(s) for the heuristic search were obtained automatically by applying Neighbor-Join and BioNJ algorithms to a matrix of pairwise distances estimated using a JTT model, and then selecting the topology with superior log likelihood value. The analysis involved 270 amino acid sequences. All positions with less than 95% site coverage were eliminated. That is, fewer than 5% alignment

gaps, missing data, and ambiguous bases were allowed at any position. There were a total of 282 positions in the final dataset. Evolutionary analyses were conducted in MEGA7 (Kumar et al., 2015). A midpoint rooted circular phylogenetic tree was created and annotated in Interactive Tree of Life (Letunic and Bork, 2016; iTOL, <https://itol.embl.de/>).

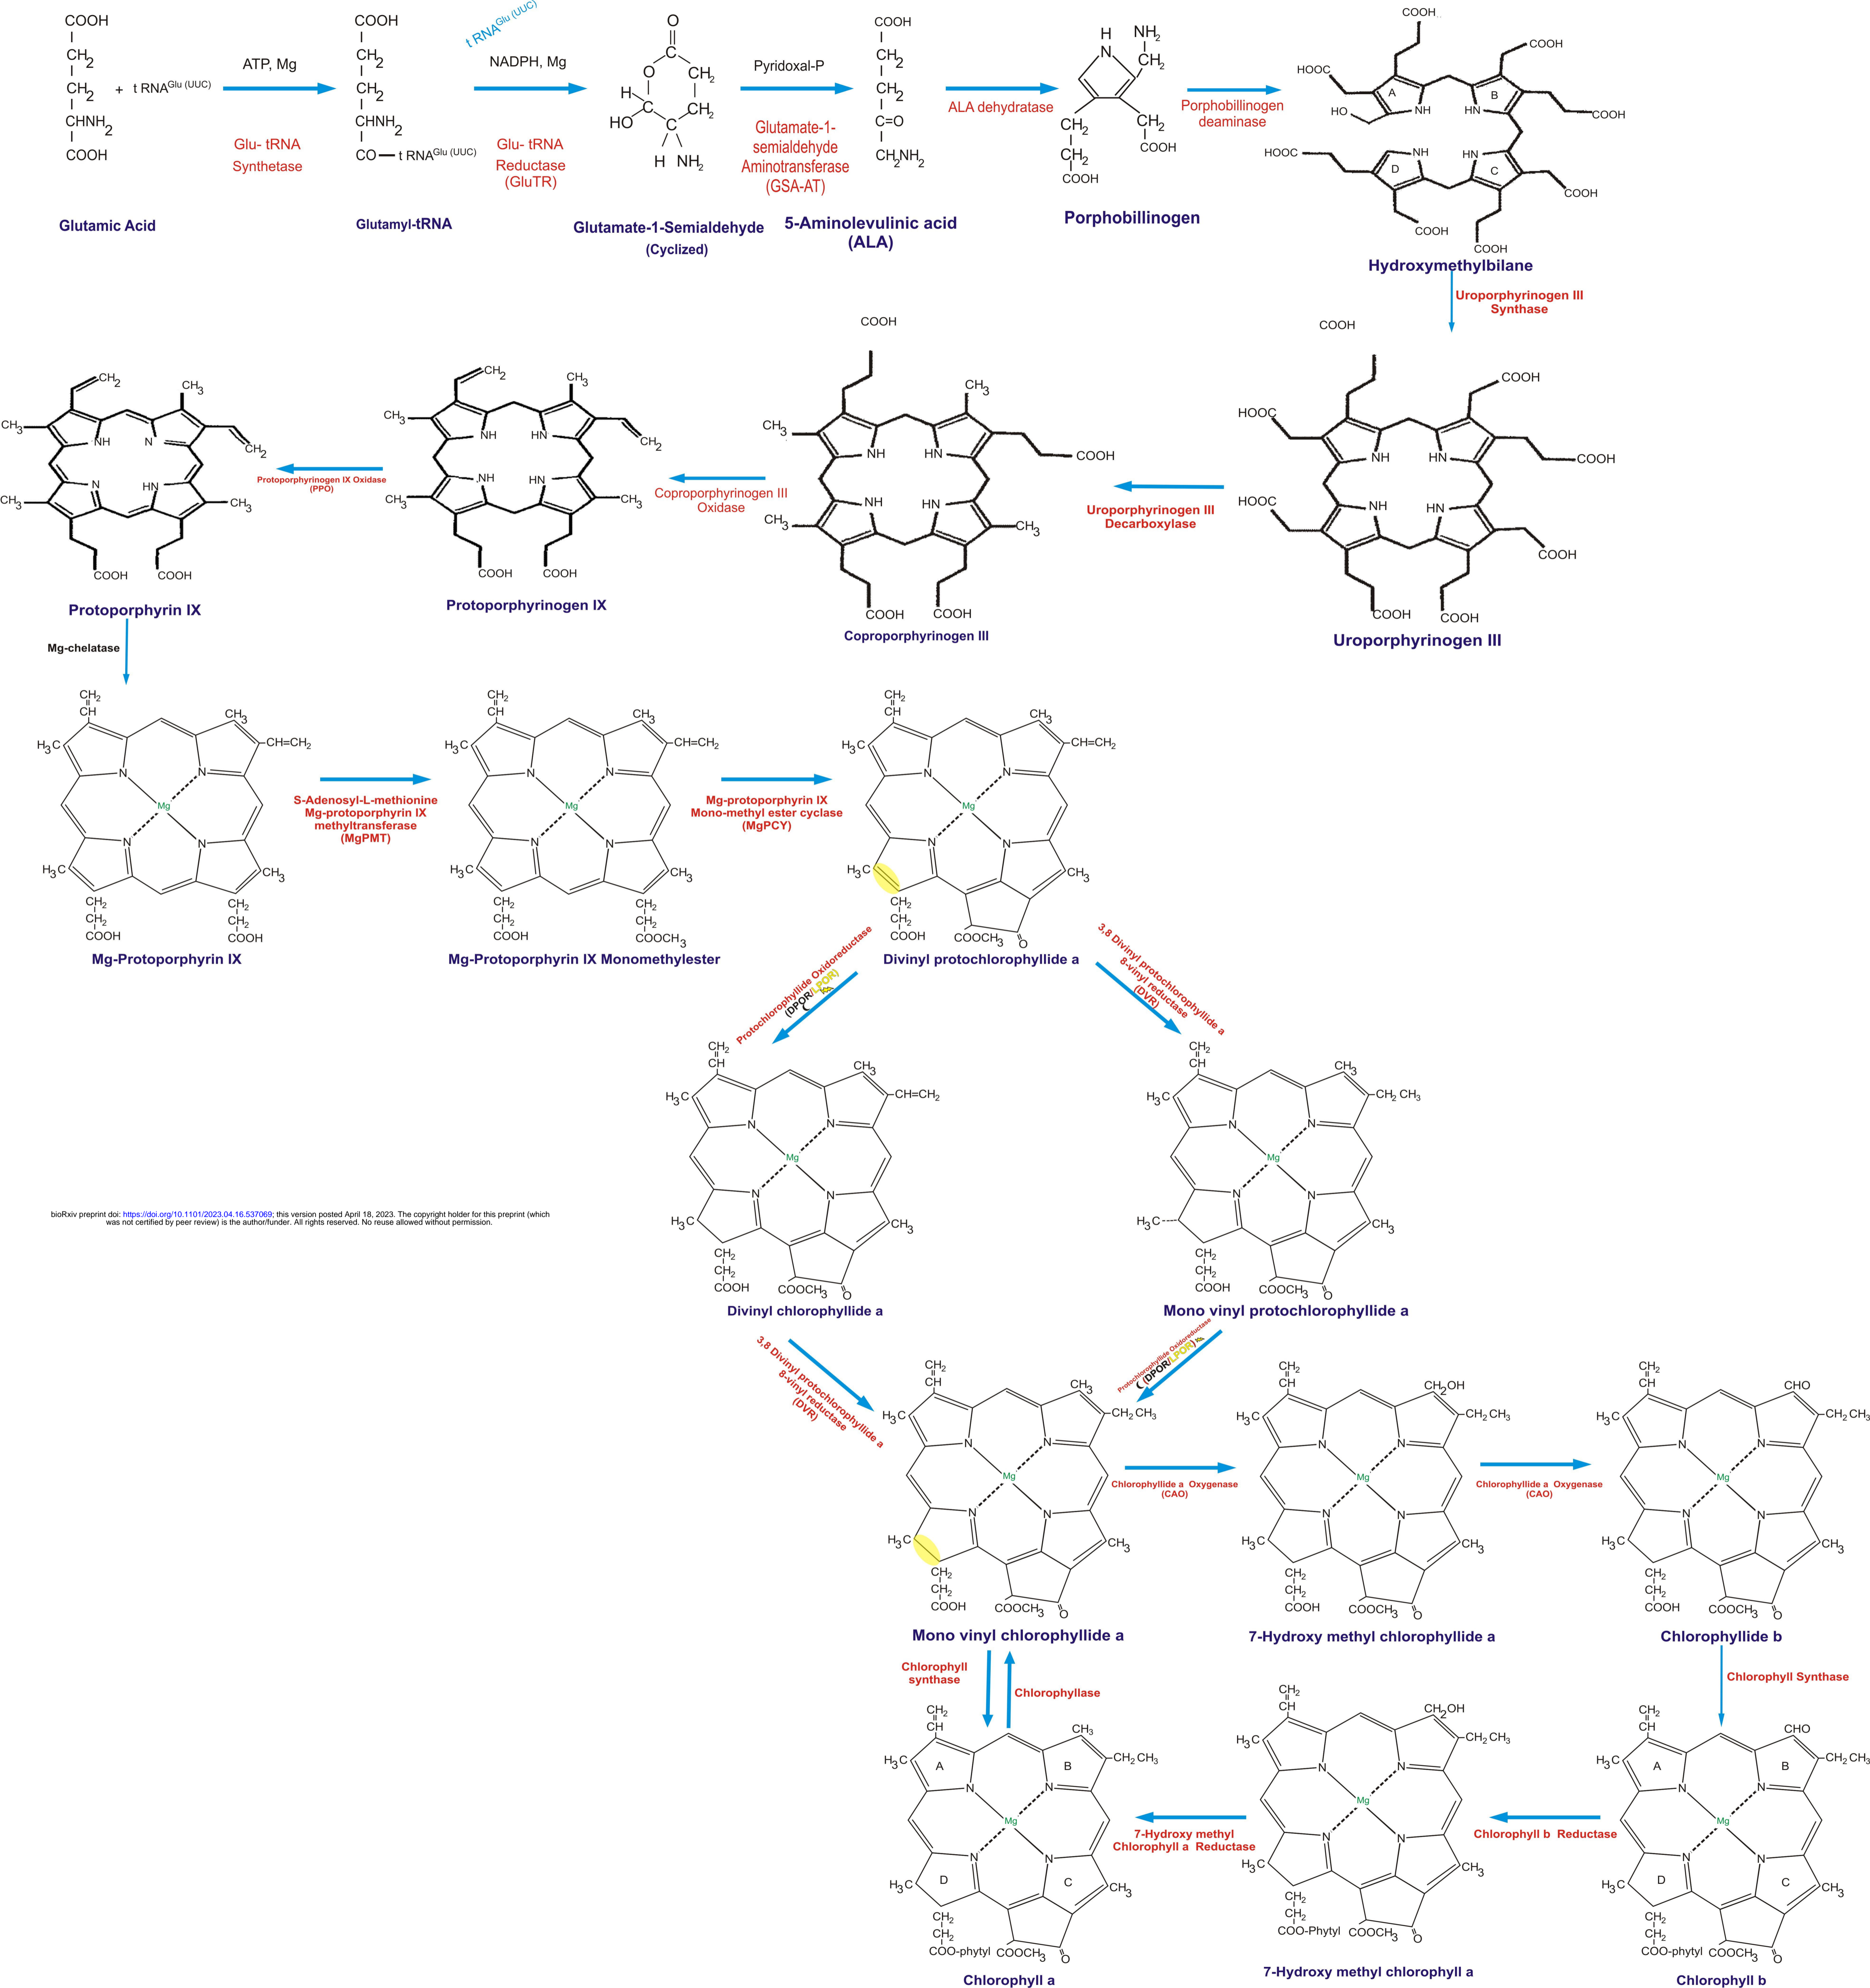

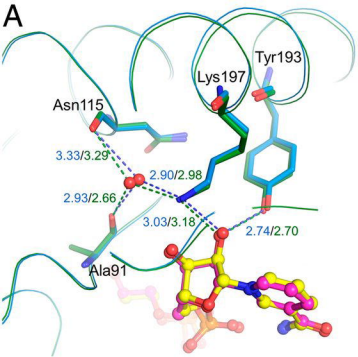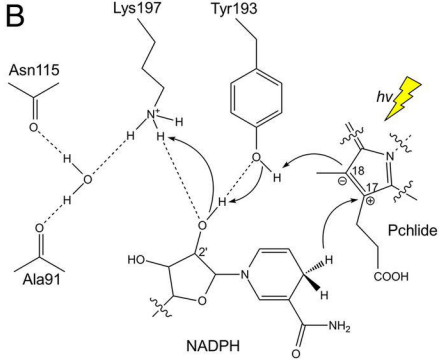

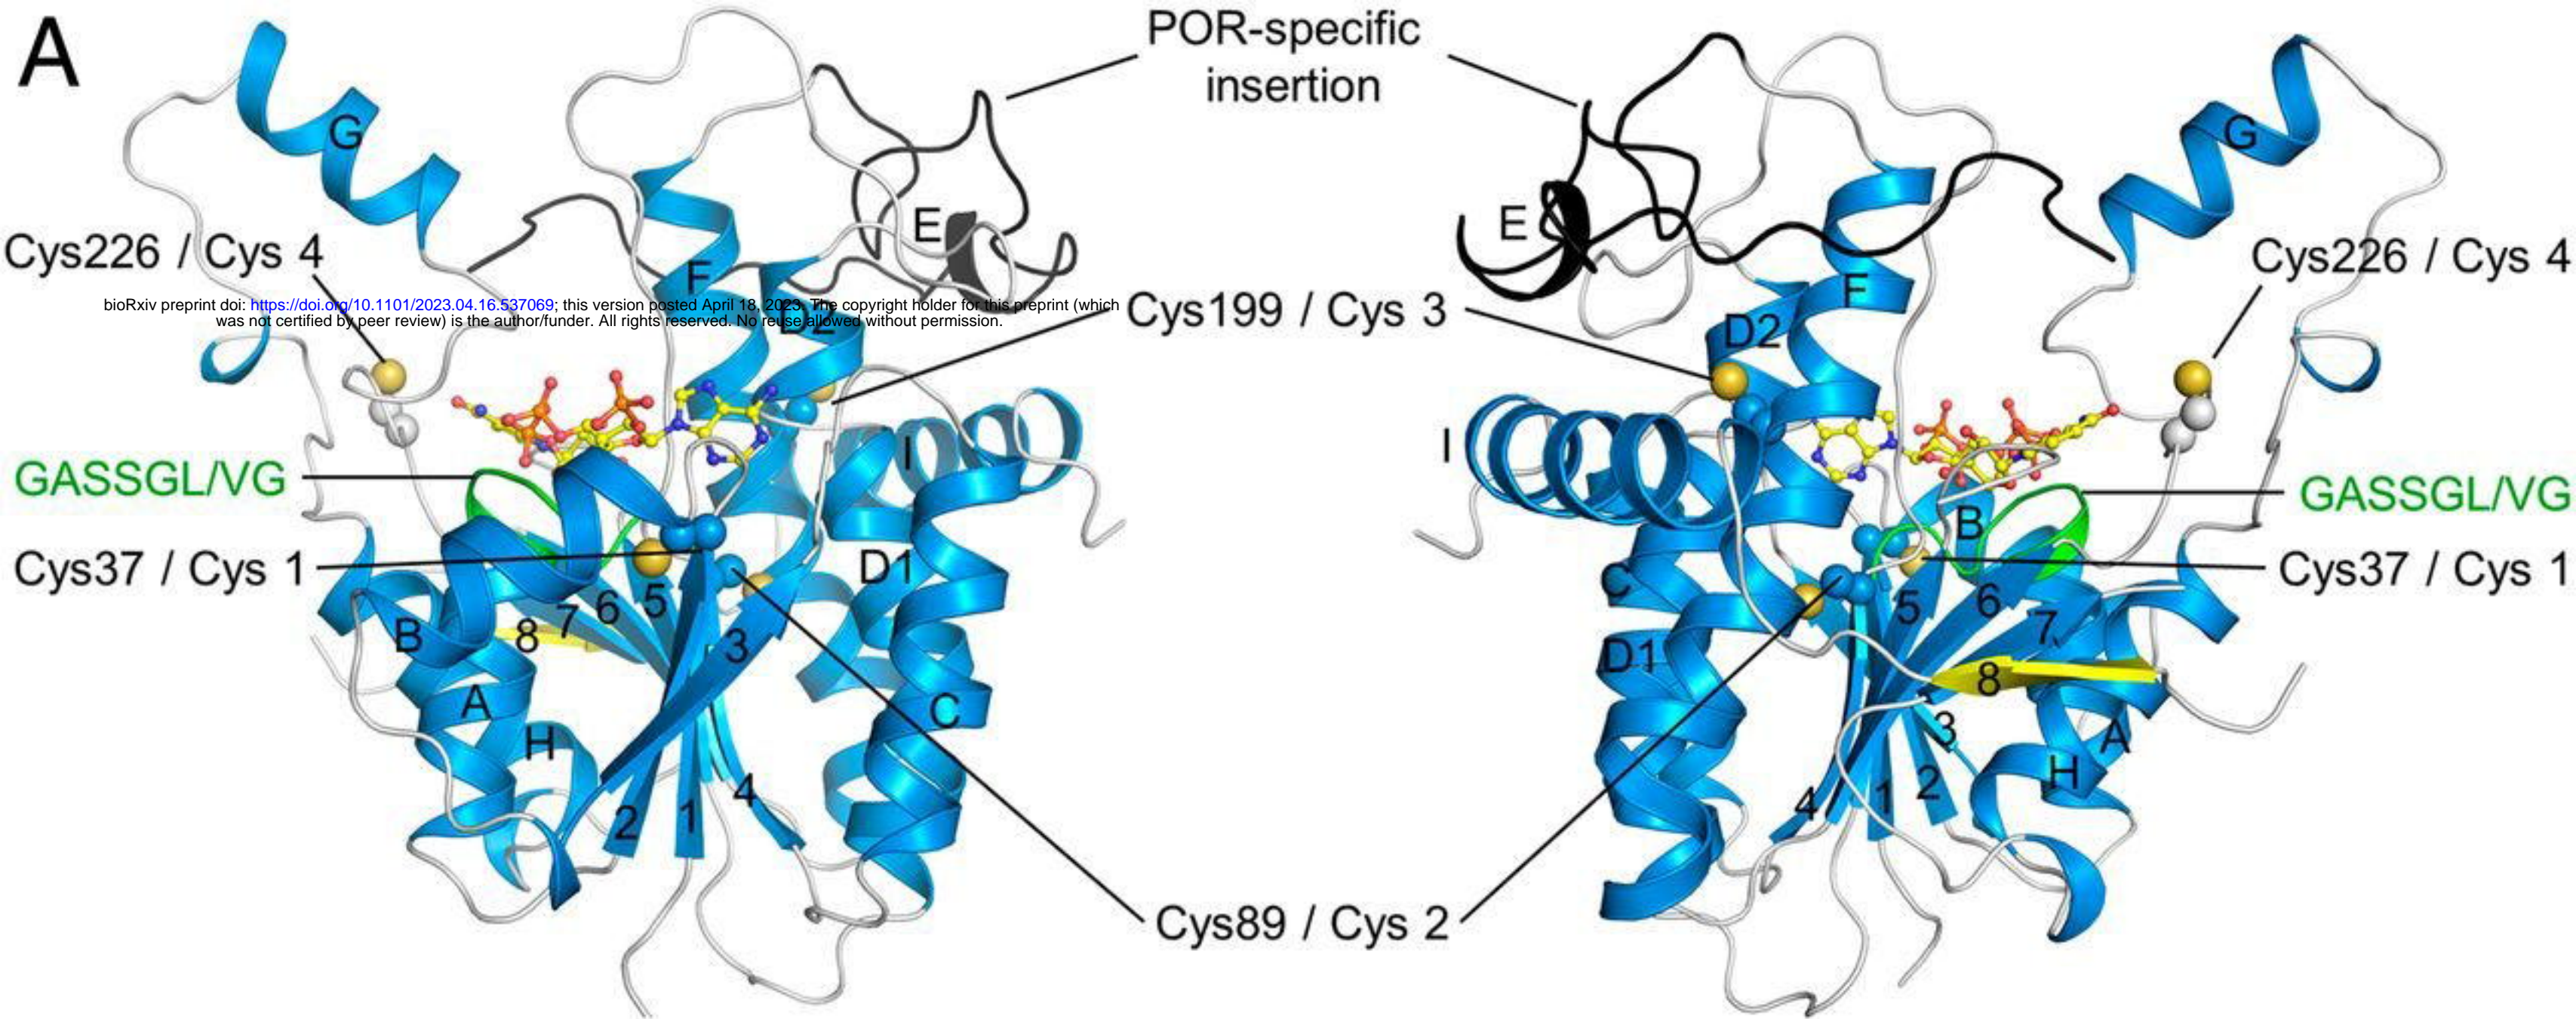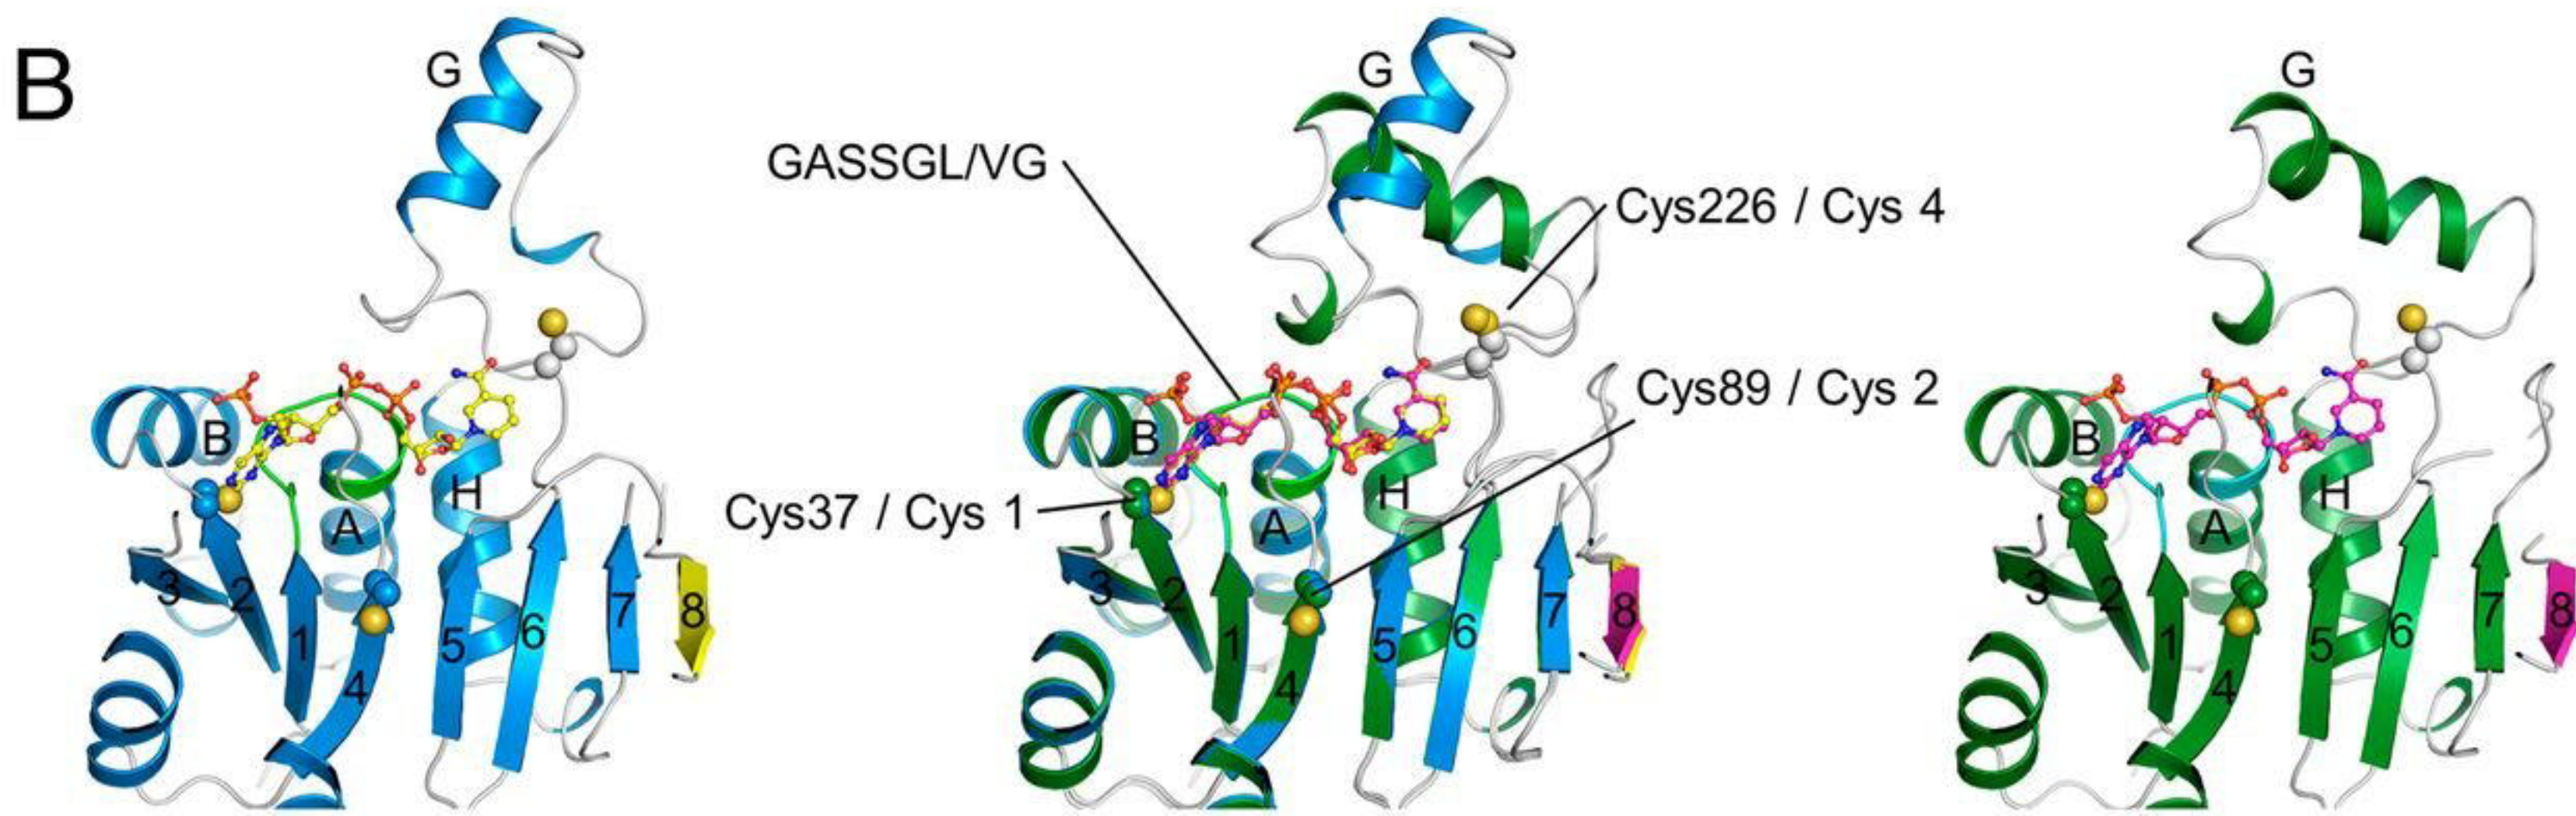

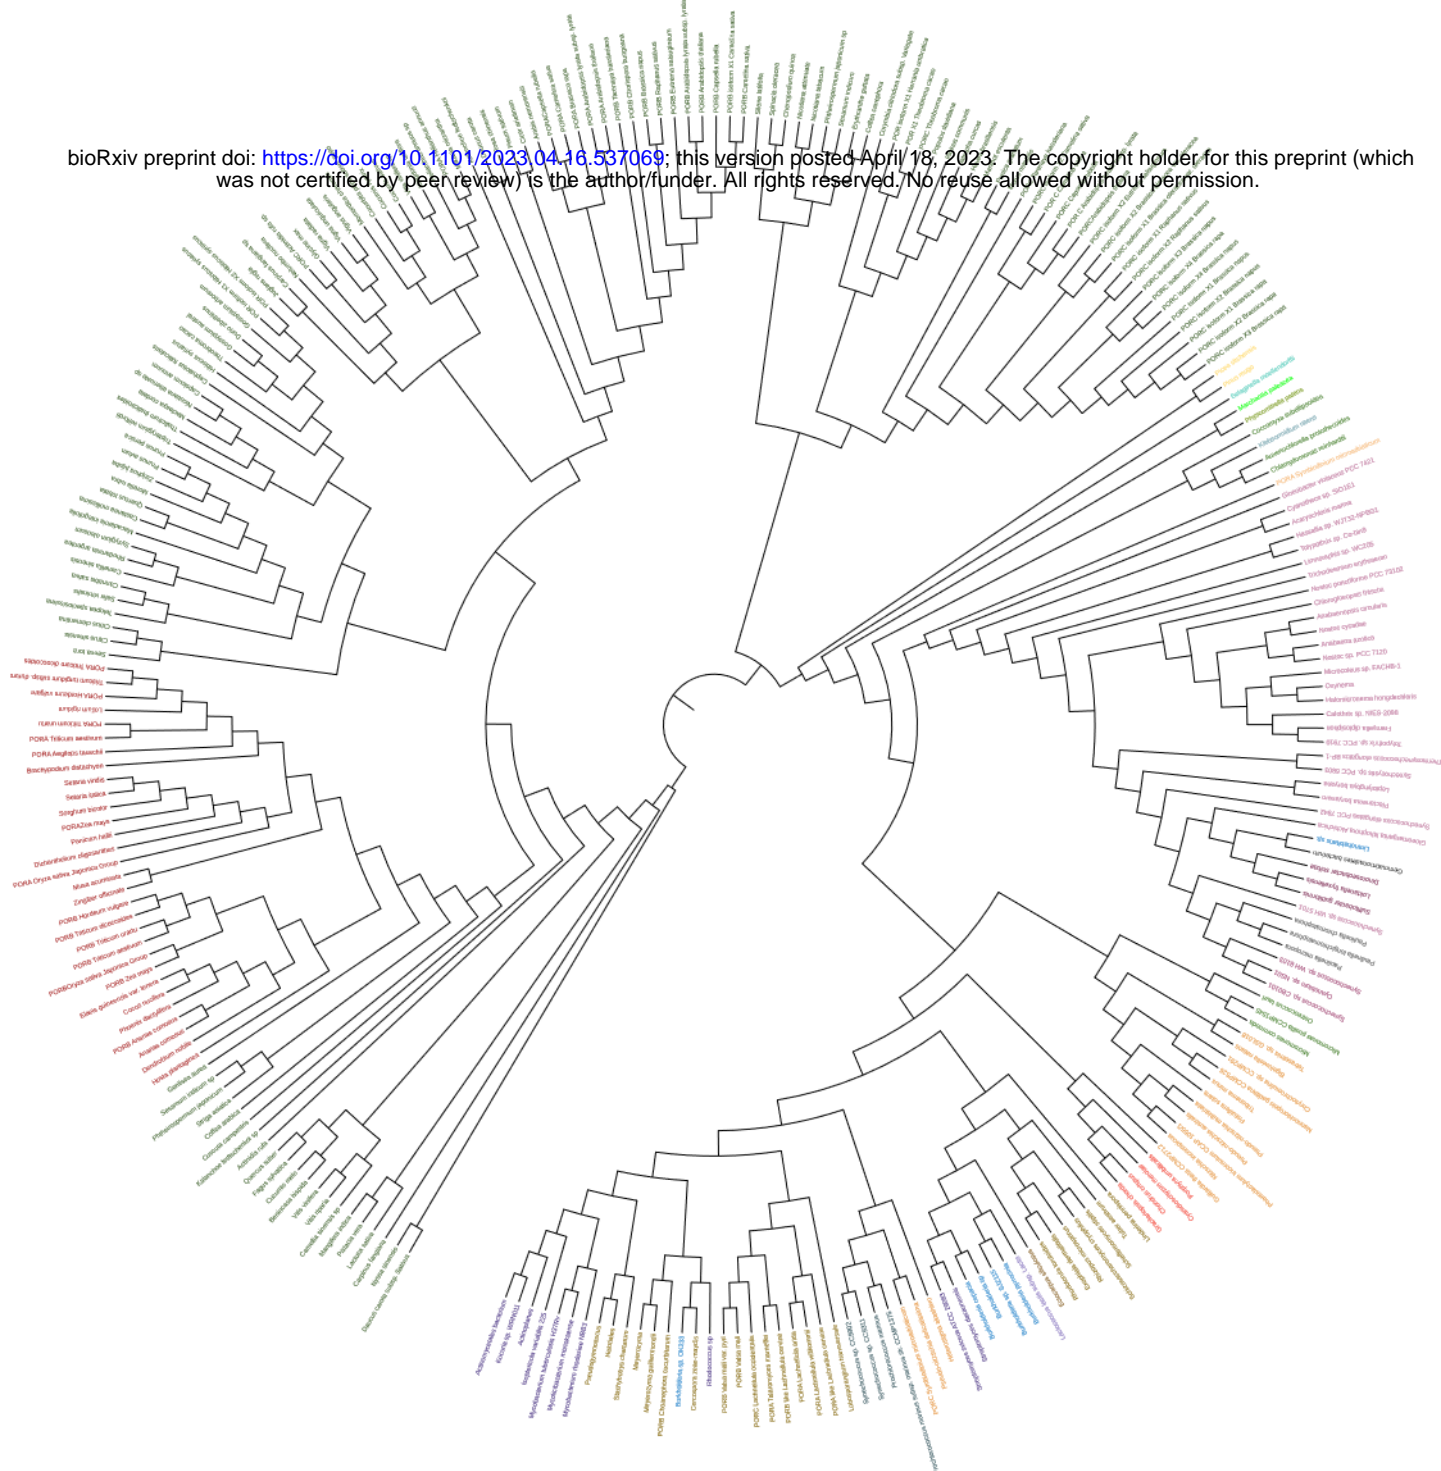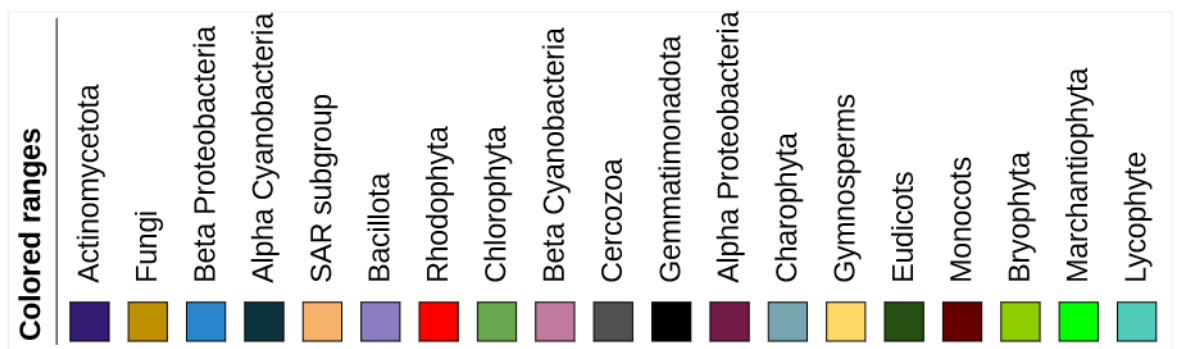

Source: https://www.biorxiv.org/content/10.1101/2023.04.16.537069v1.full.pdf
